# Supplementary material
Source: PubMed Central journal article supplement (PMC8110333)

### ARG24\_chainA\_contact network

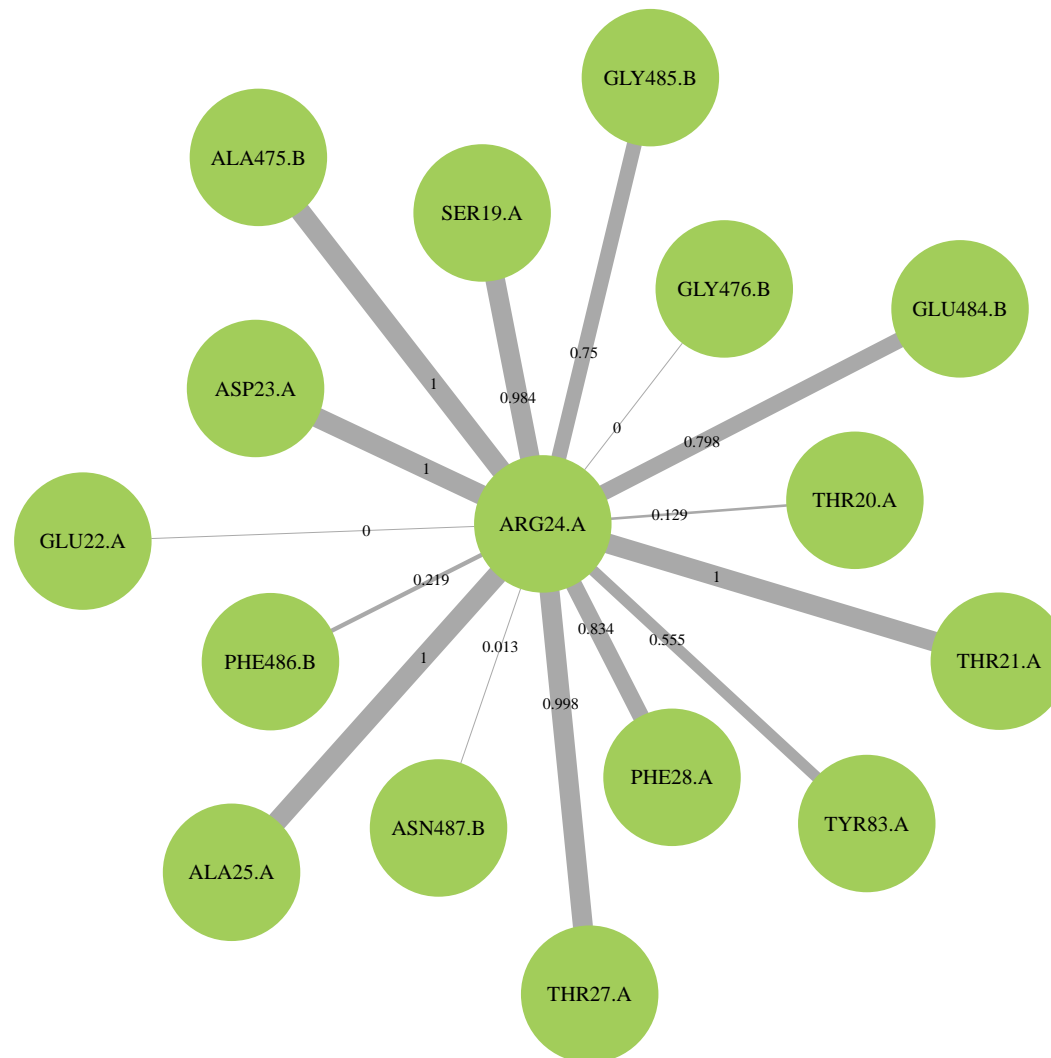

### THR27\_chainA\_contact network

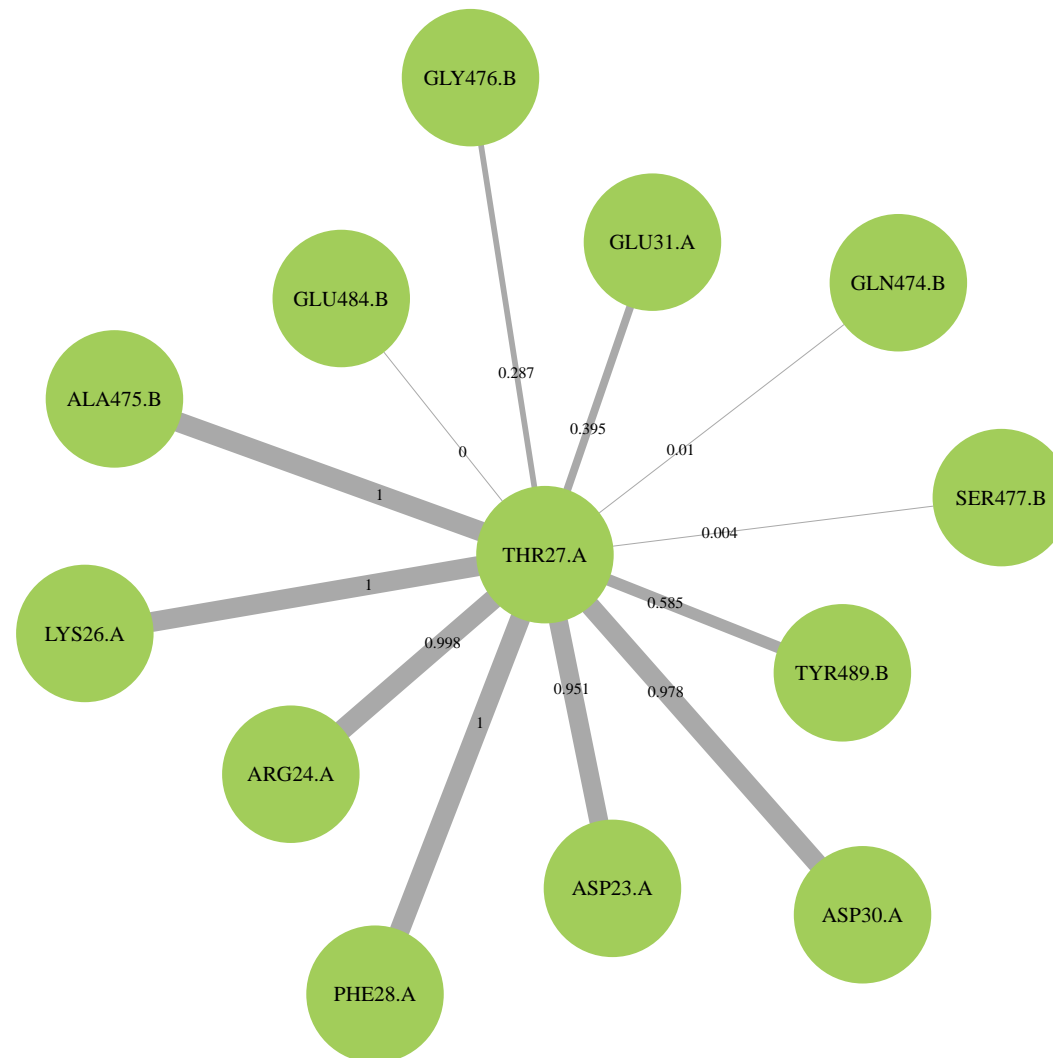

### PHE28\_chainA\_contact network

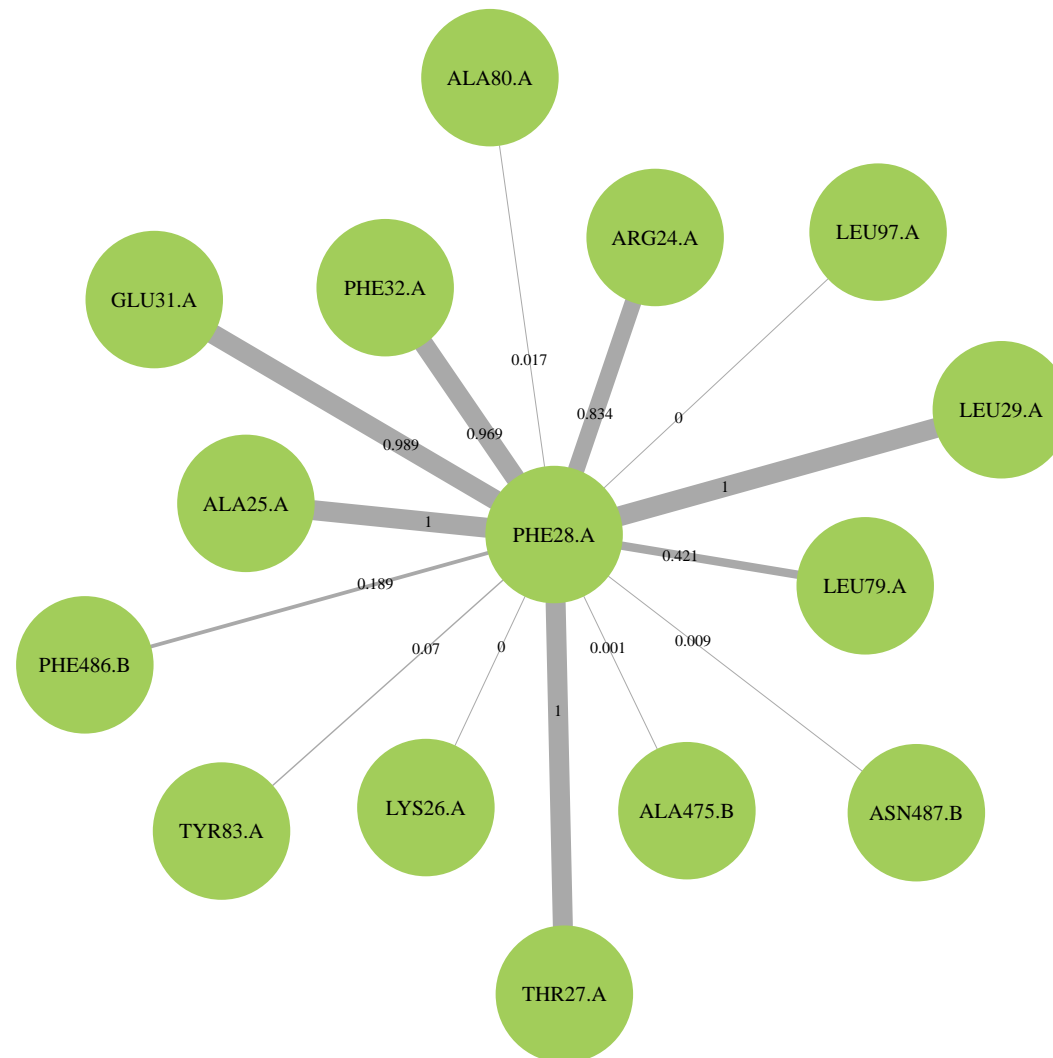

### GLU31\_chainA\_contact network

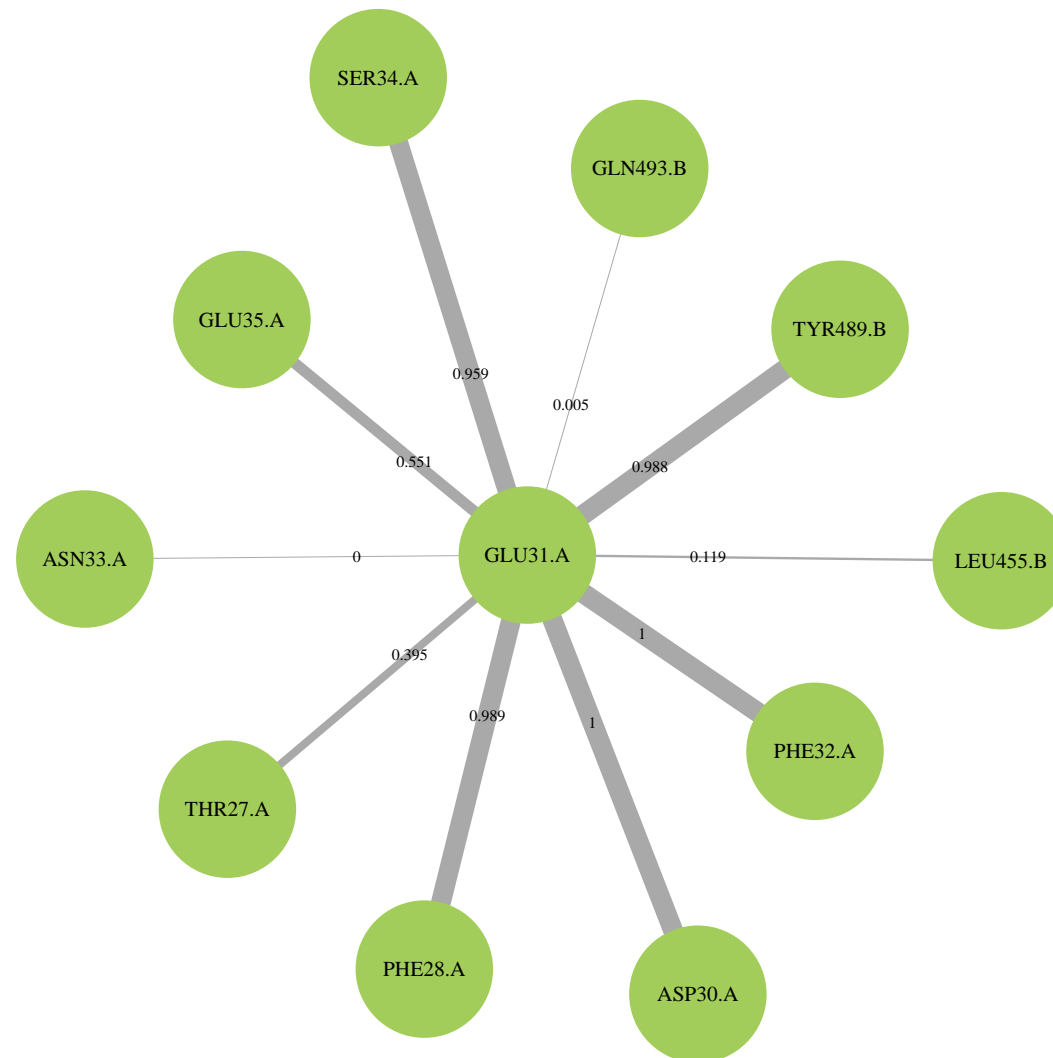

### SER34\_chainA\_contact network

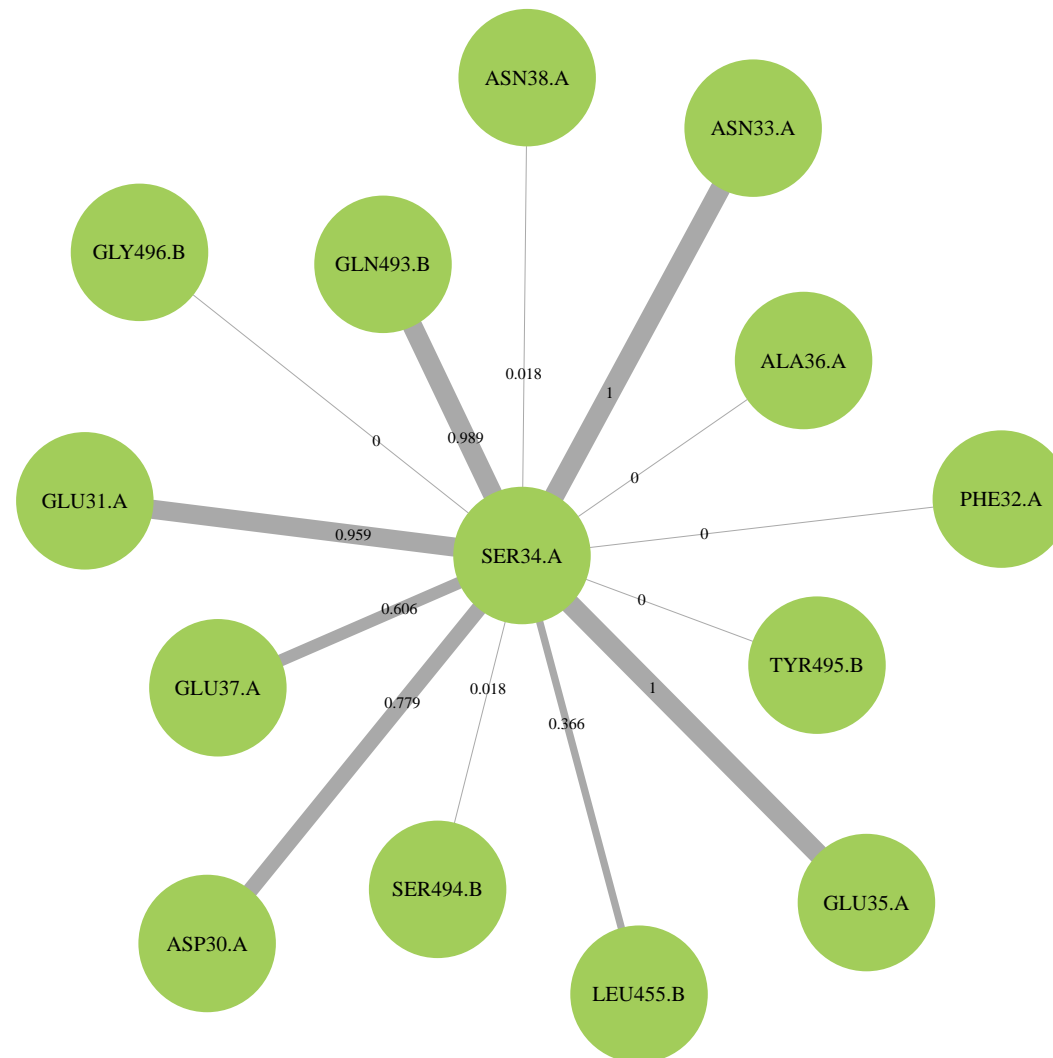

ASN38\_chainA\_contact network

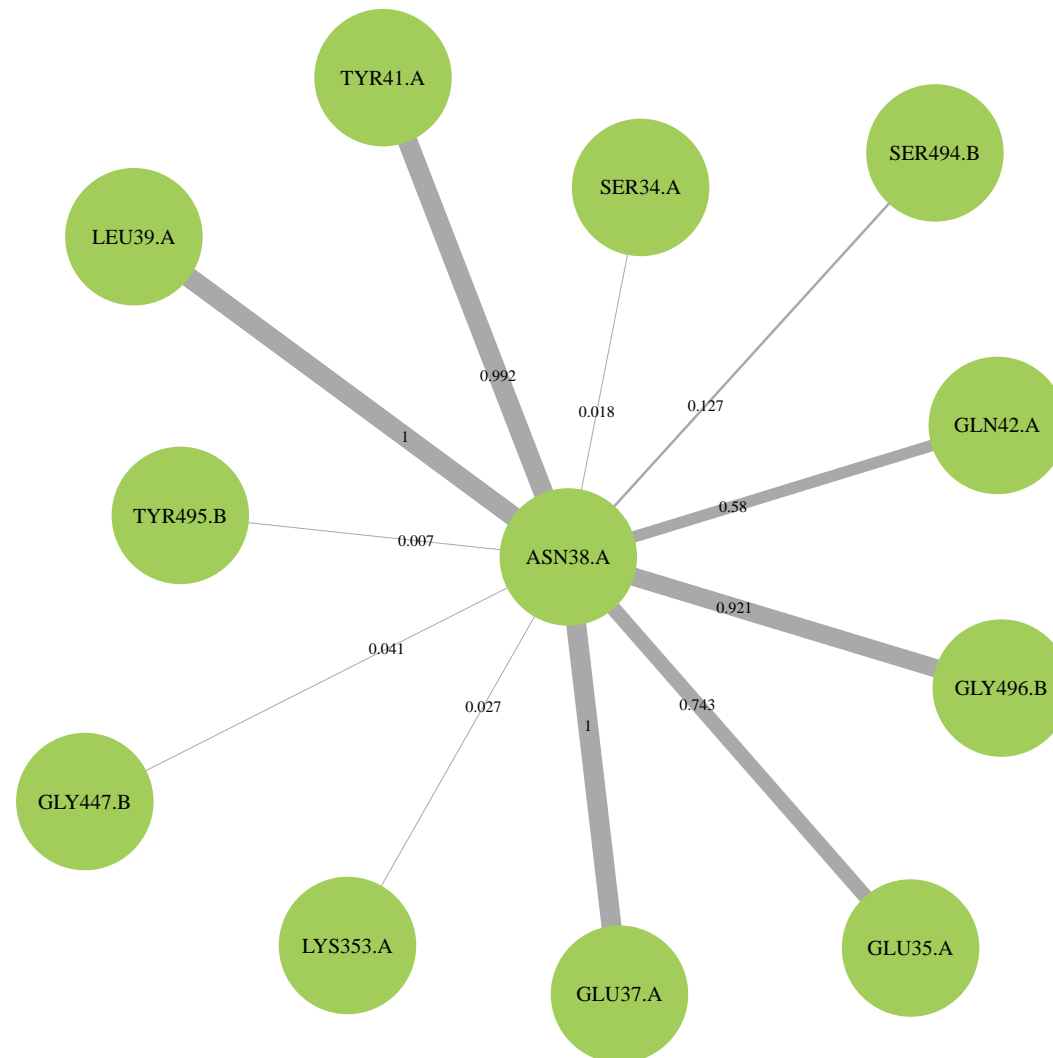

### TYR41\_chainA\_contact network

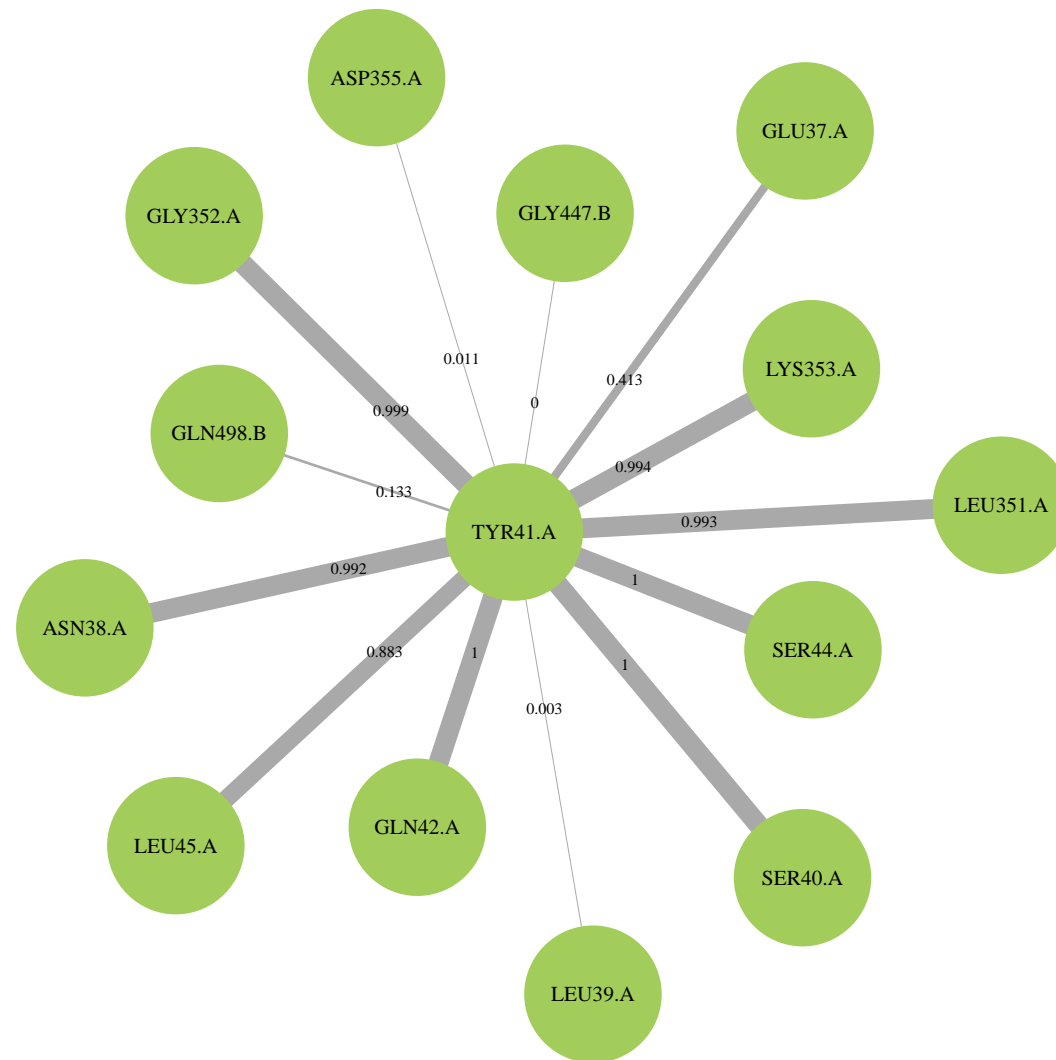

### GLN42\_chainA\_contact network

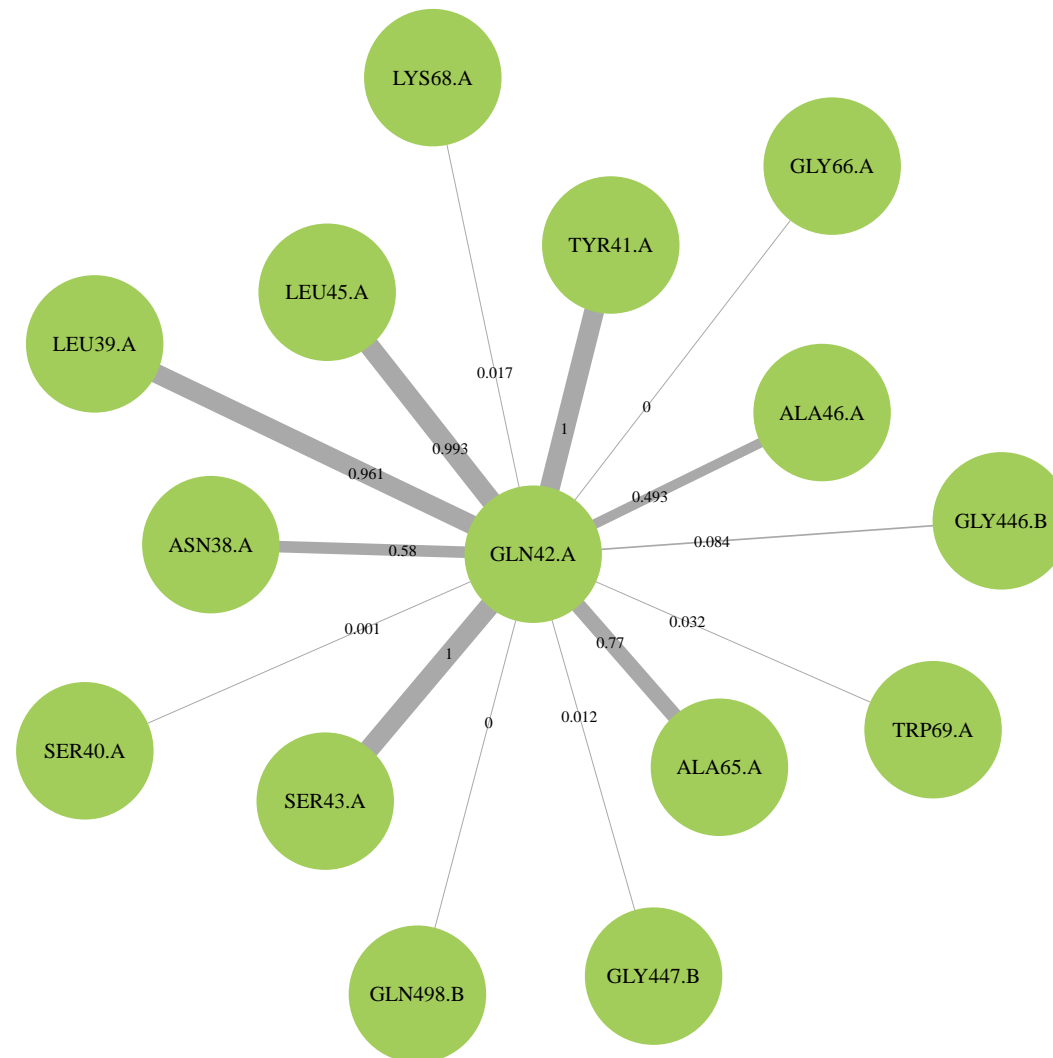



### TYR83\_chainA\_contact network

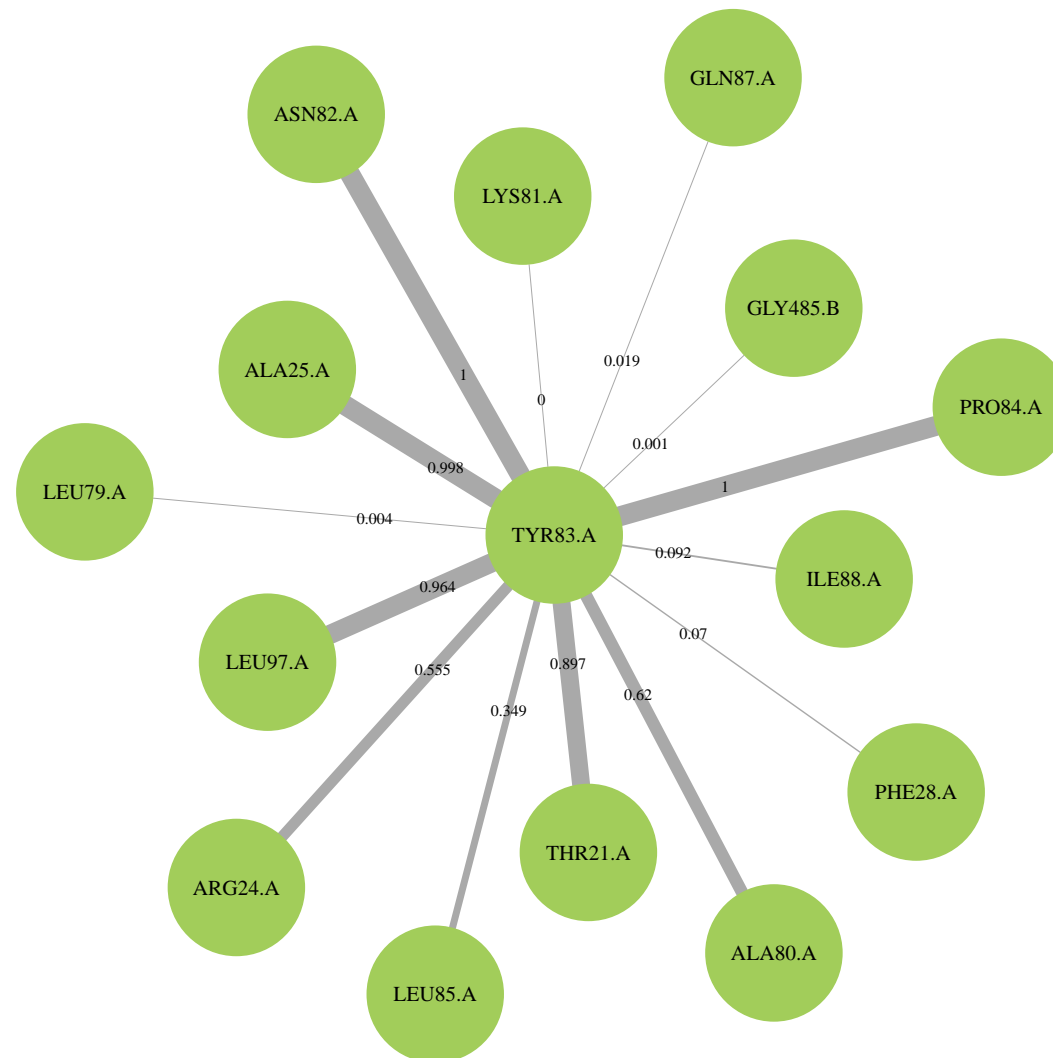

### LYS353\_chainA\_contact network

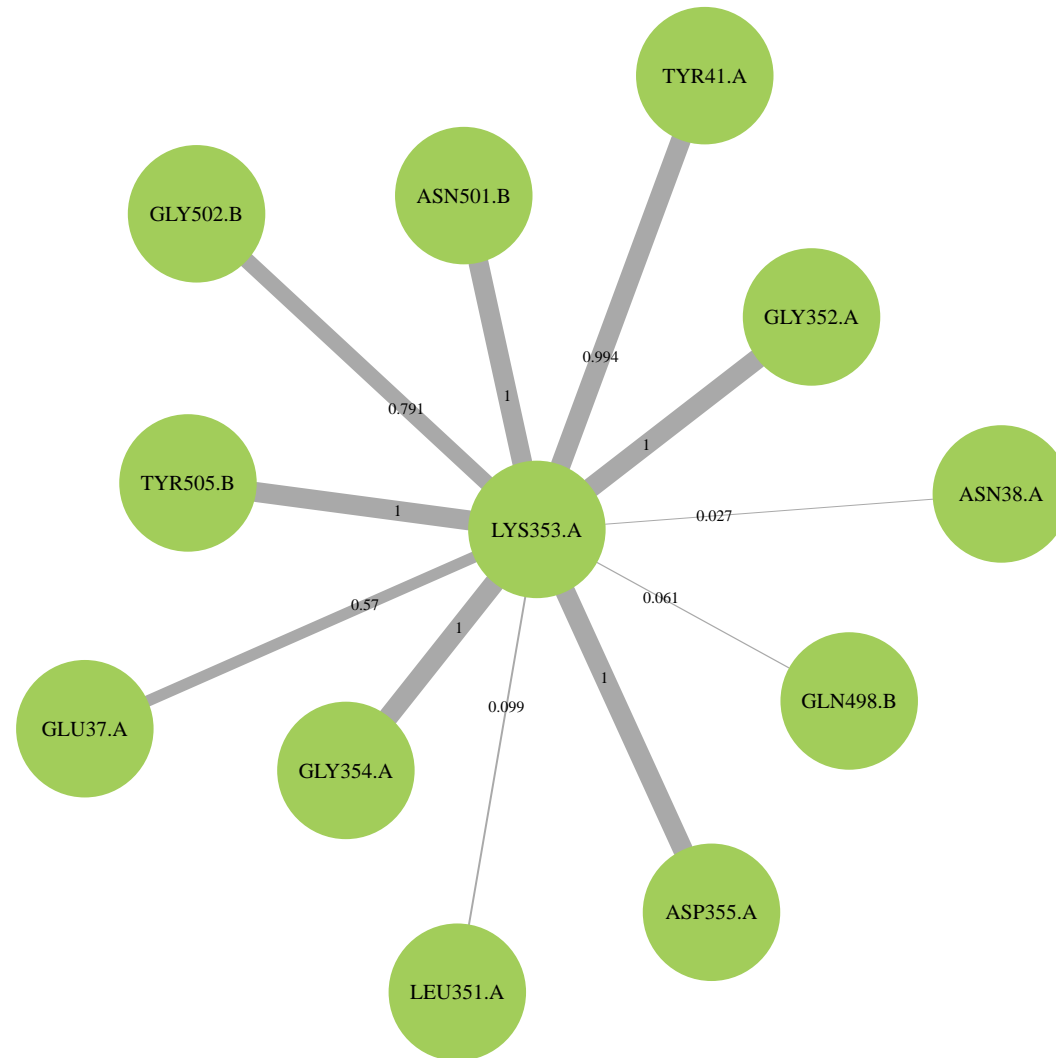

### GLY354\_chainA\_contact network

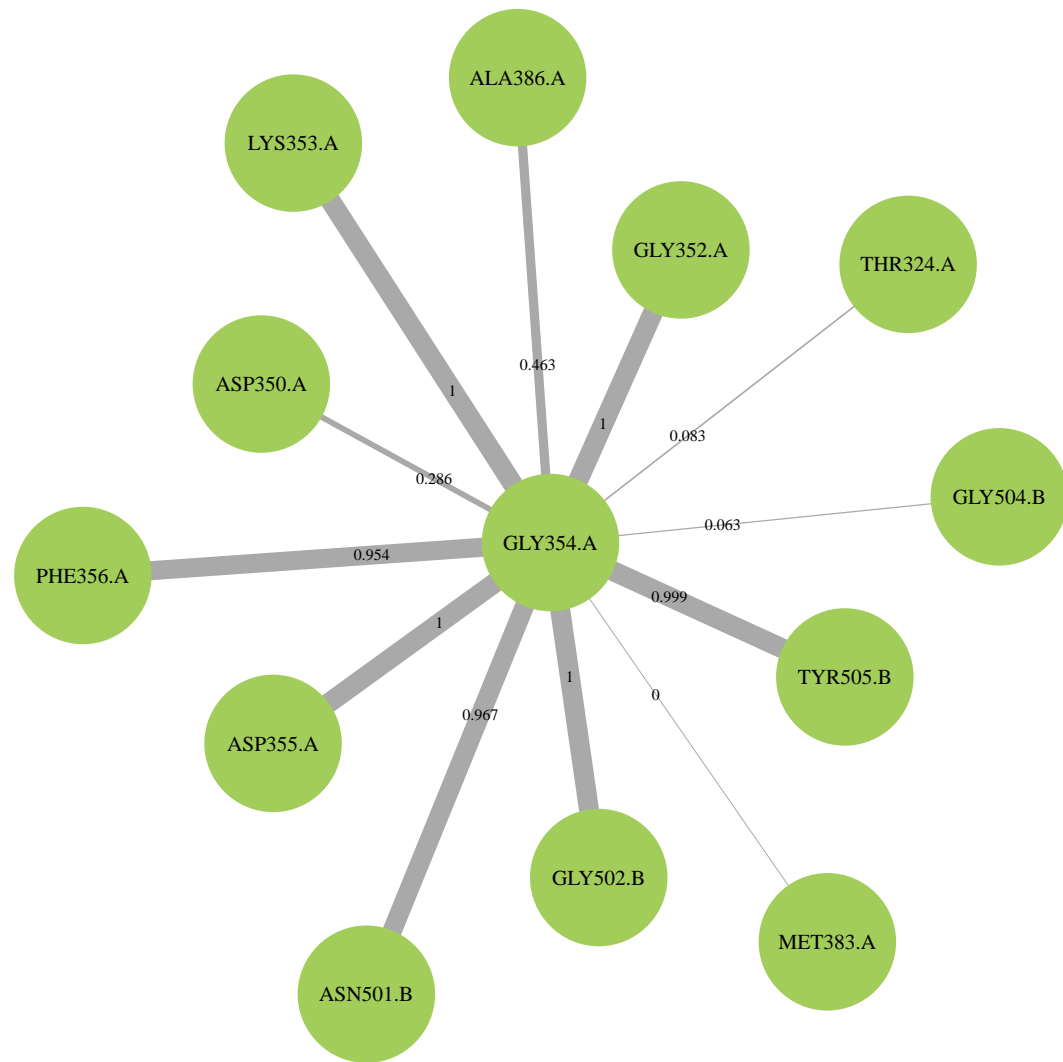

ASP355\_chainA\_contact network

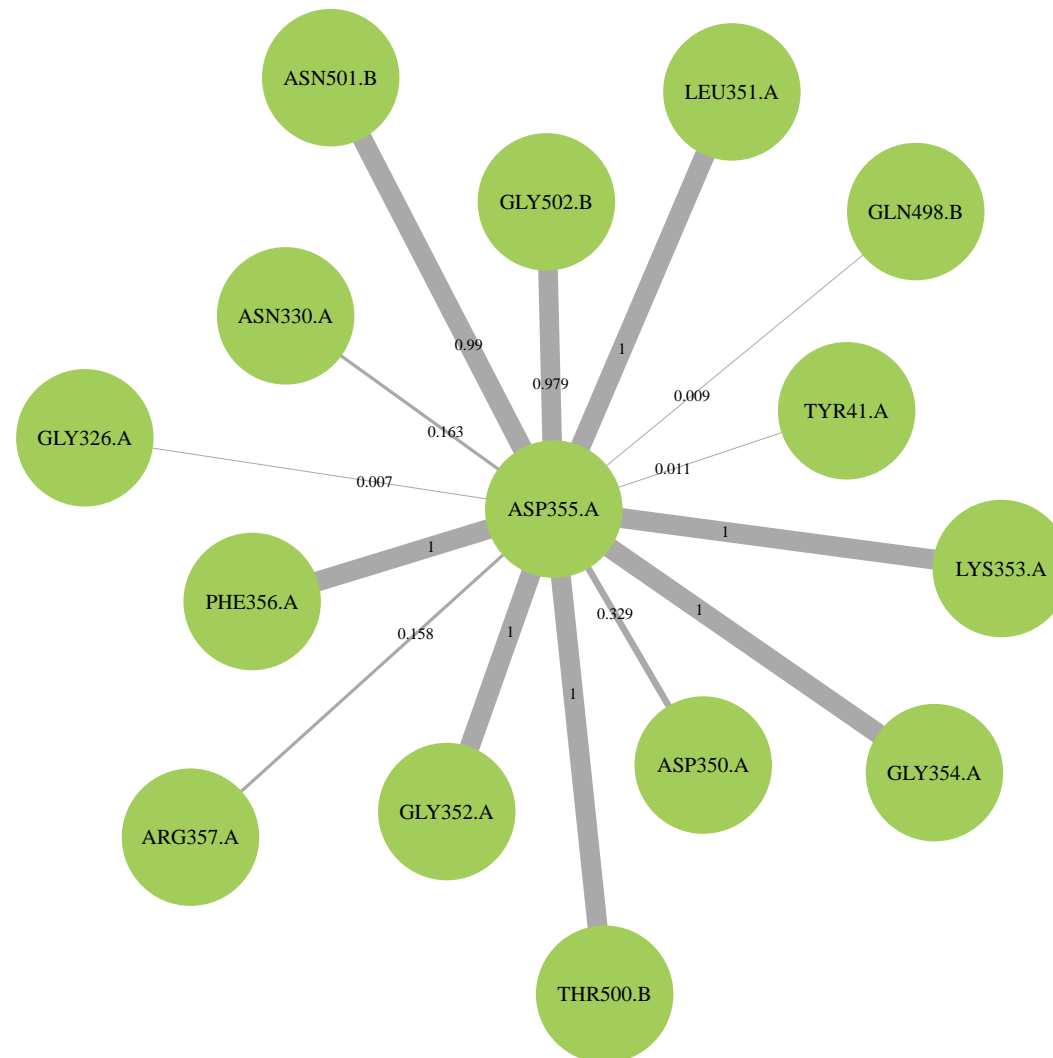

Supplement: mmc2.pdf [file mmc2.pdf]
