# Supplementary material
Source: PubMed Central journal article supplement (PMC8110333)

LEU24\_chainA\_contact network

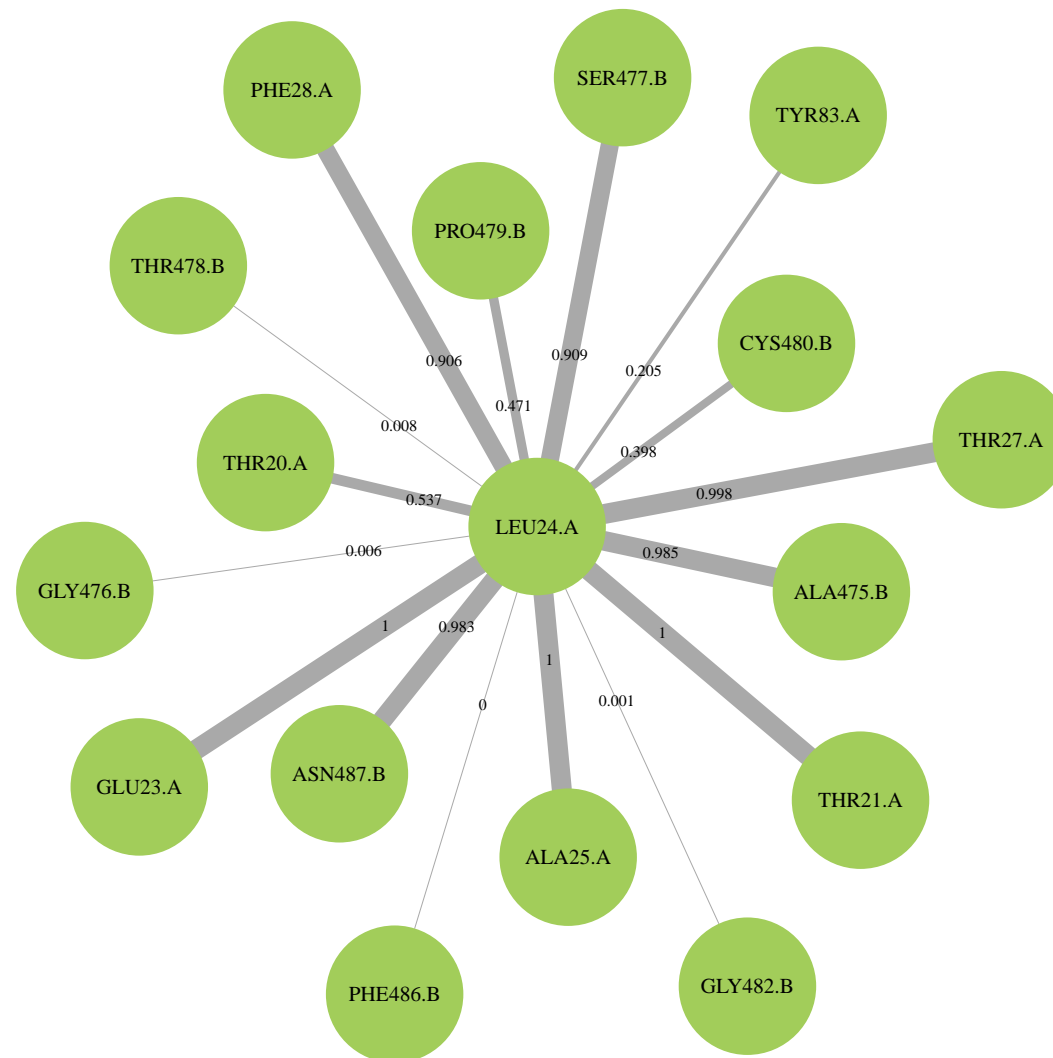

### THR27\_chainA\_contact network

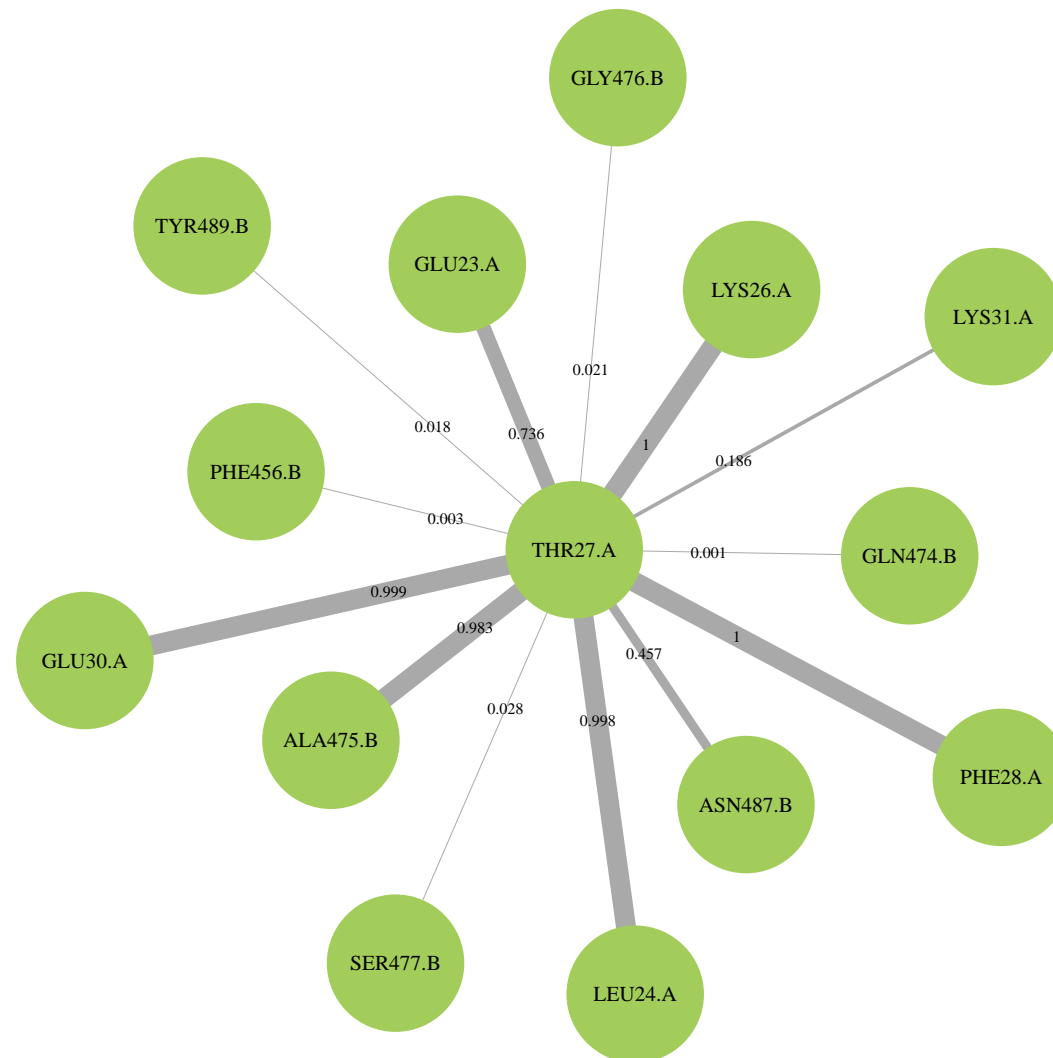

### PHE28\_chainA\_contact network

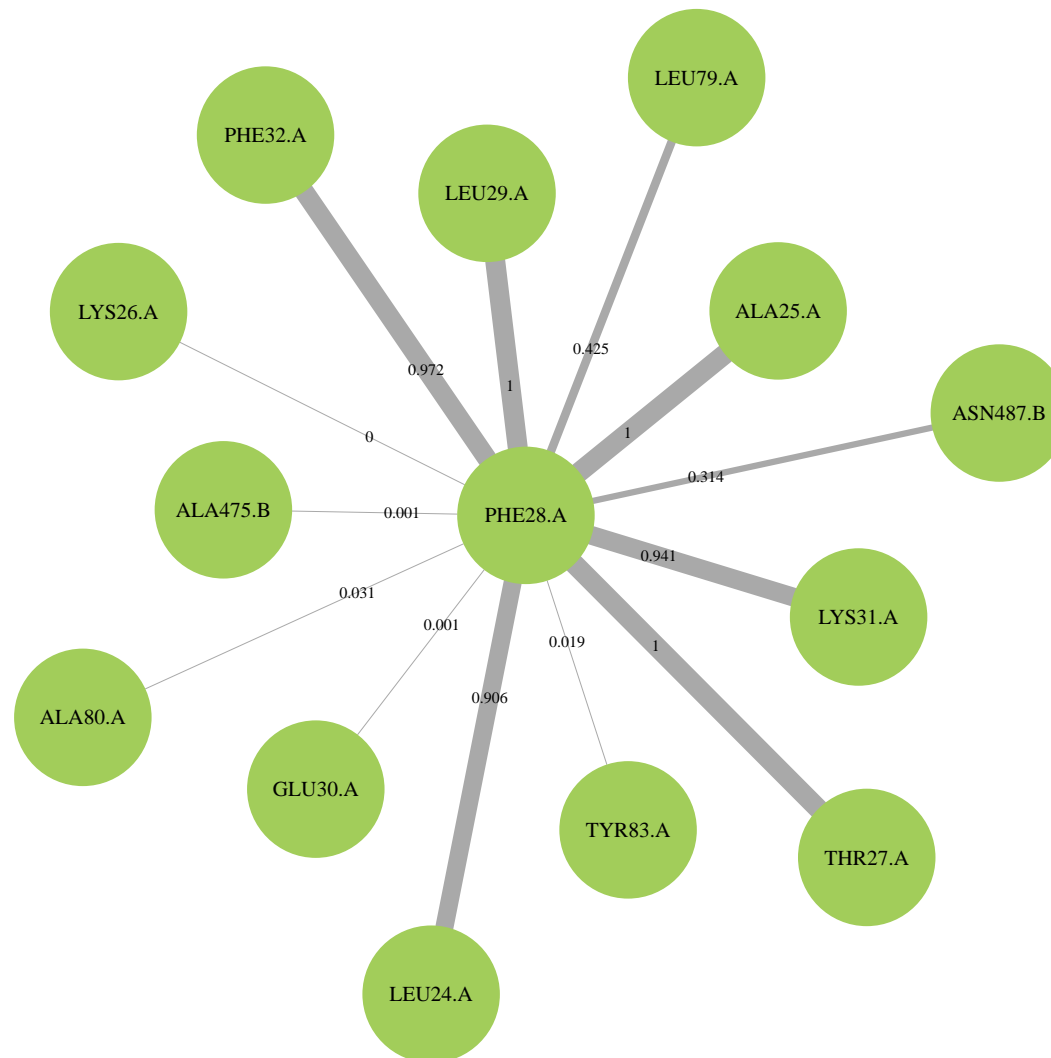

### LYS31\_chainA\_contact network

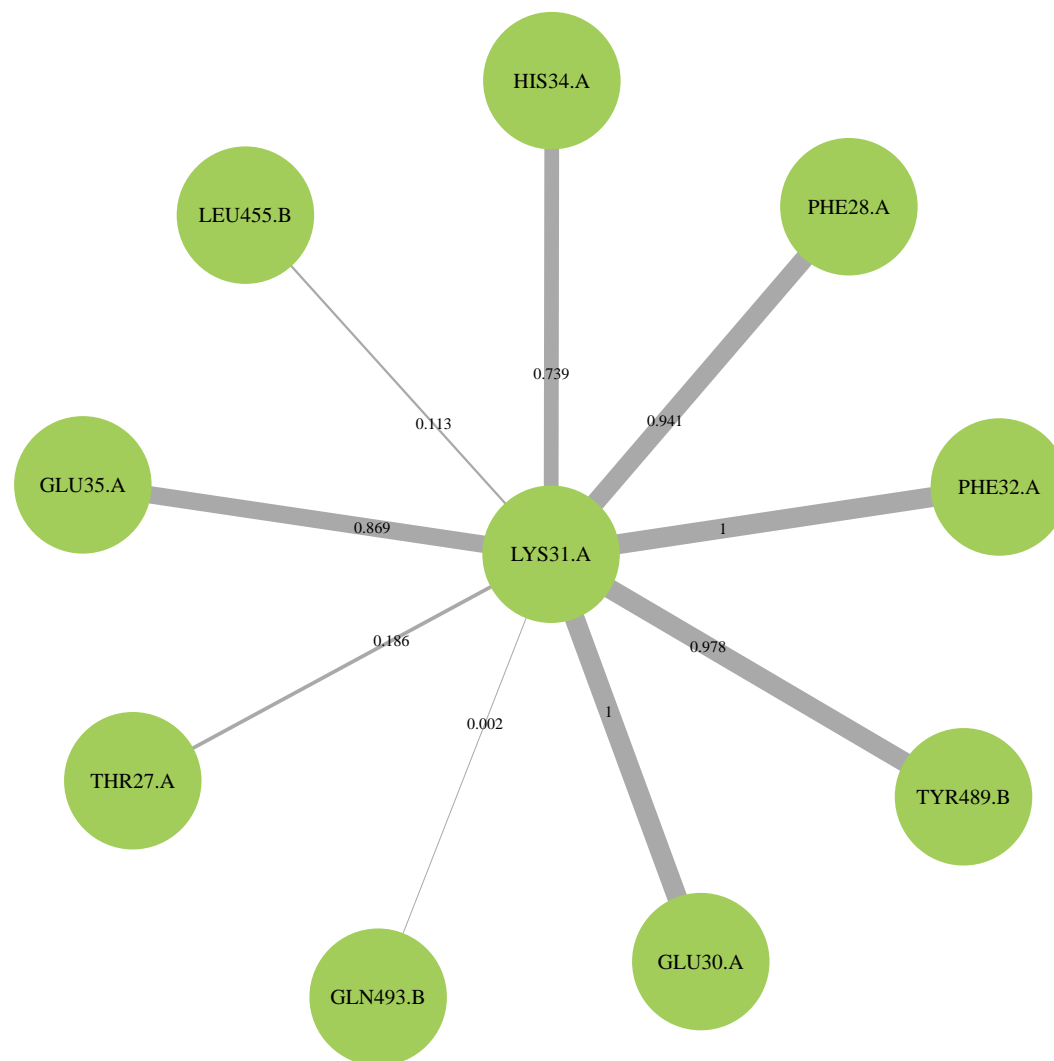

### HIS34\_chainA\_contact network

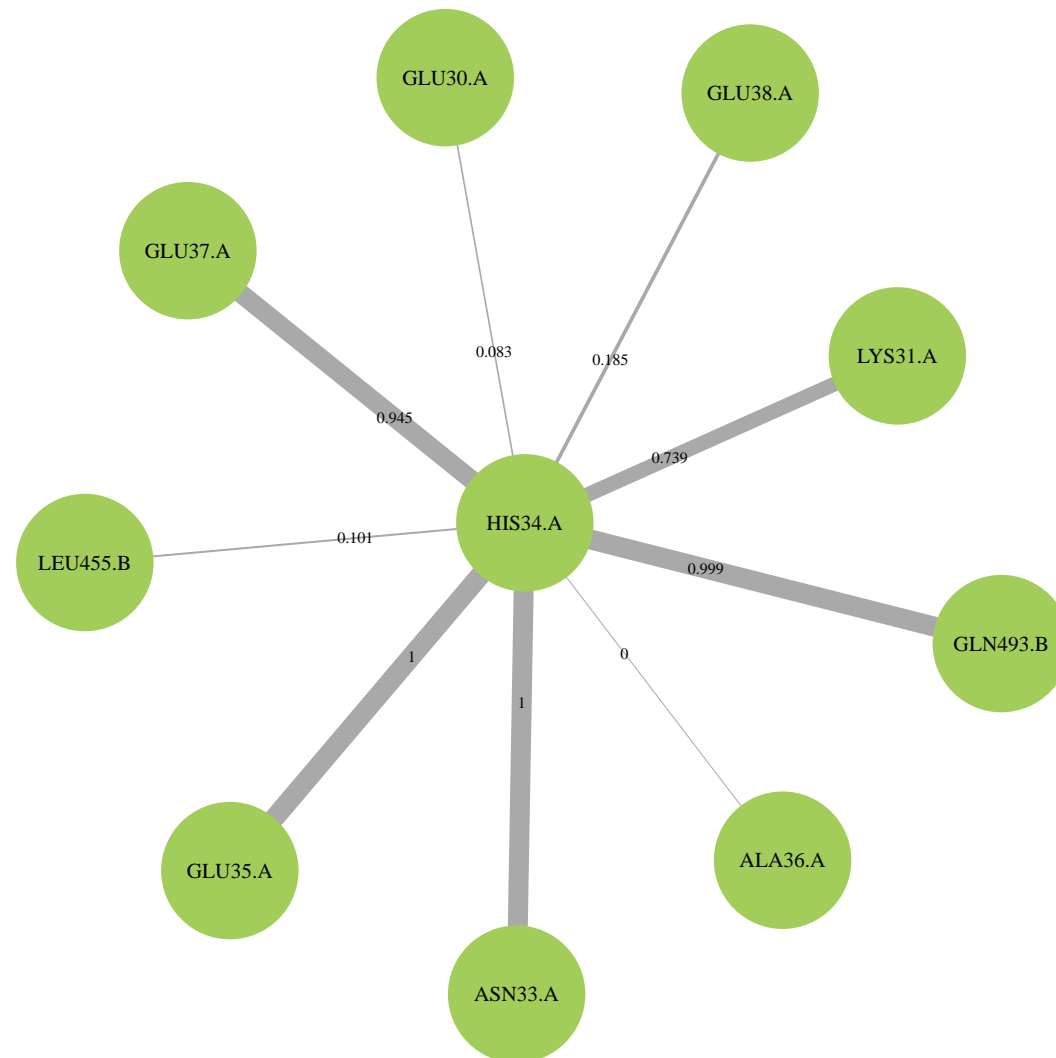

### GLU38\_chainA\_contact network

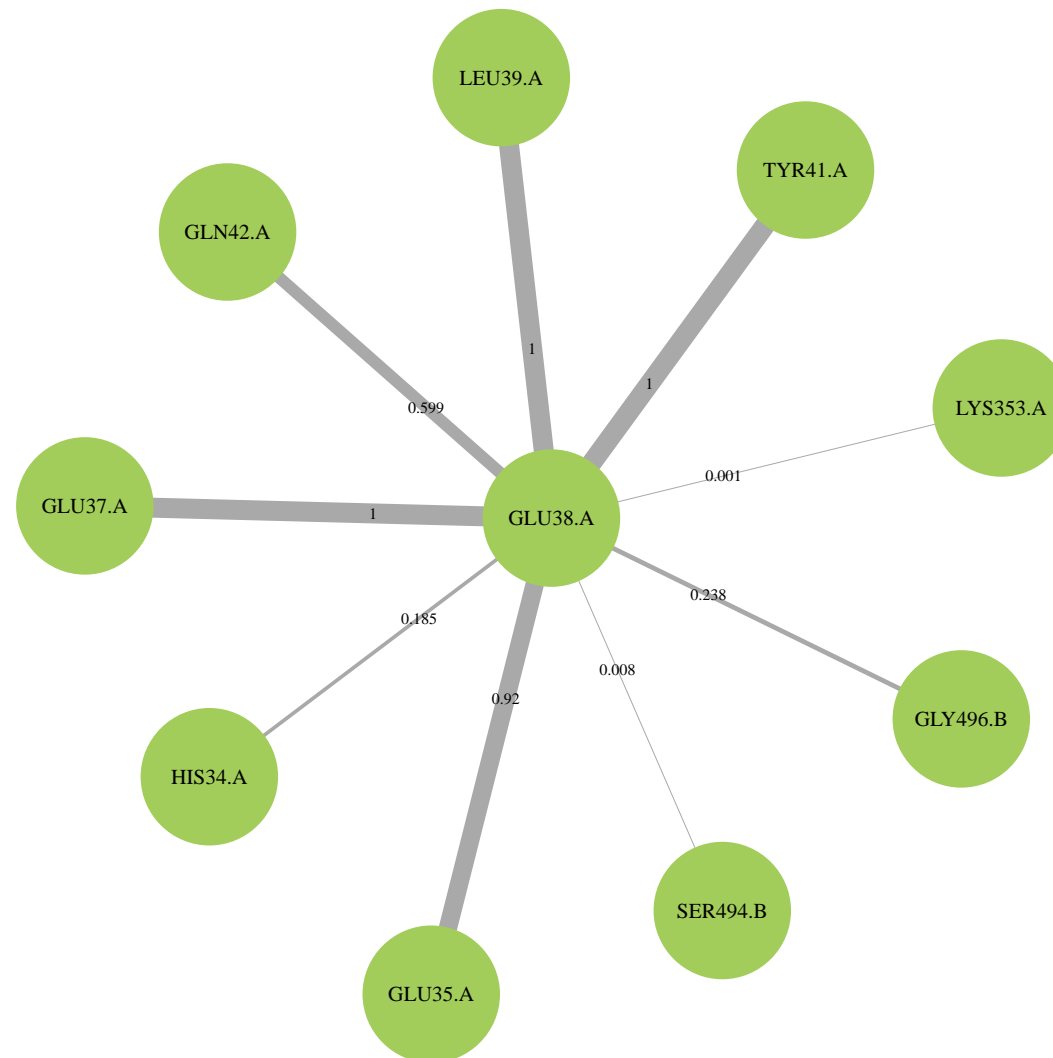

### TYR41\_chainA\_contact network

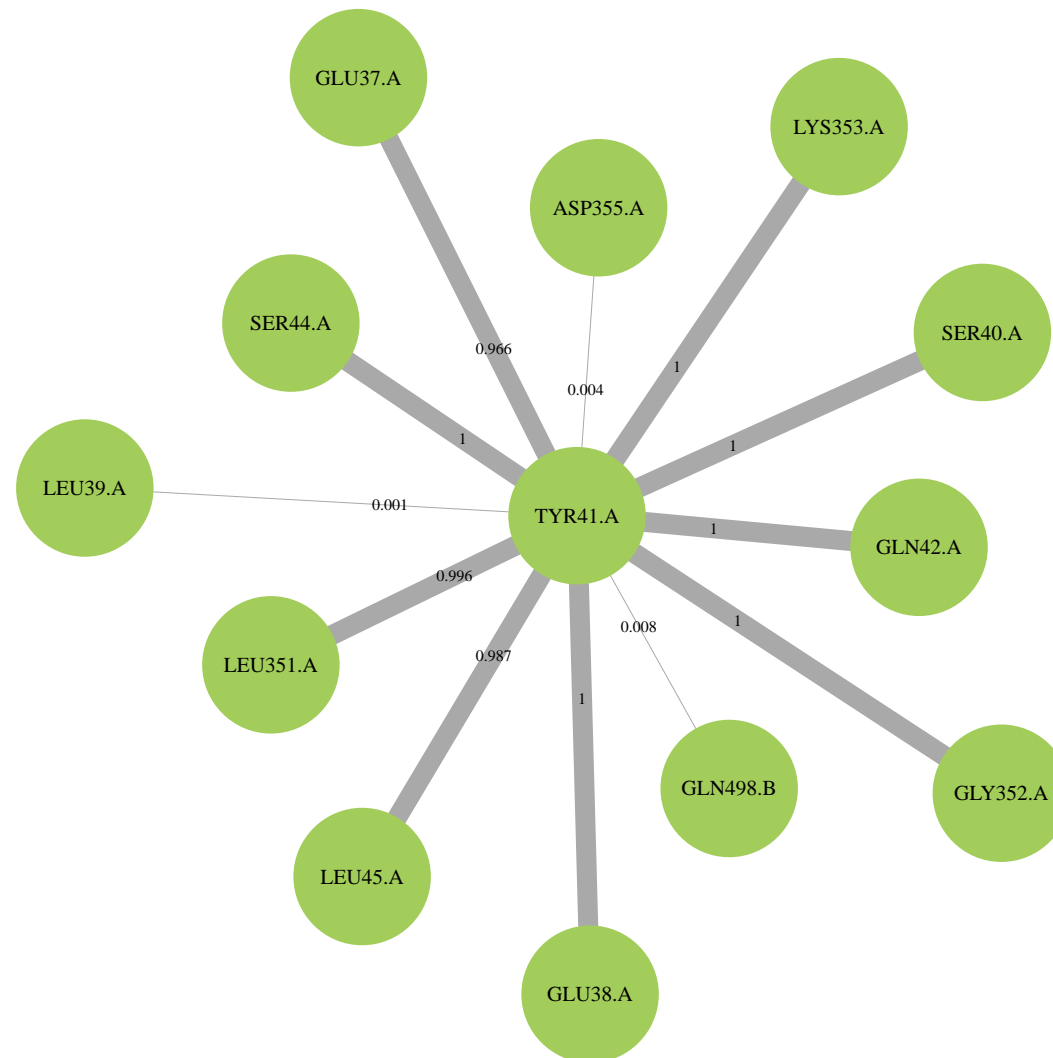

### GLN42\_chainA\_contact network

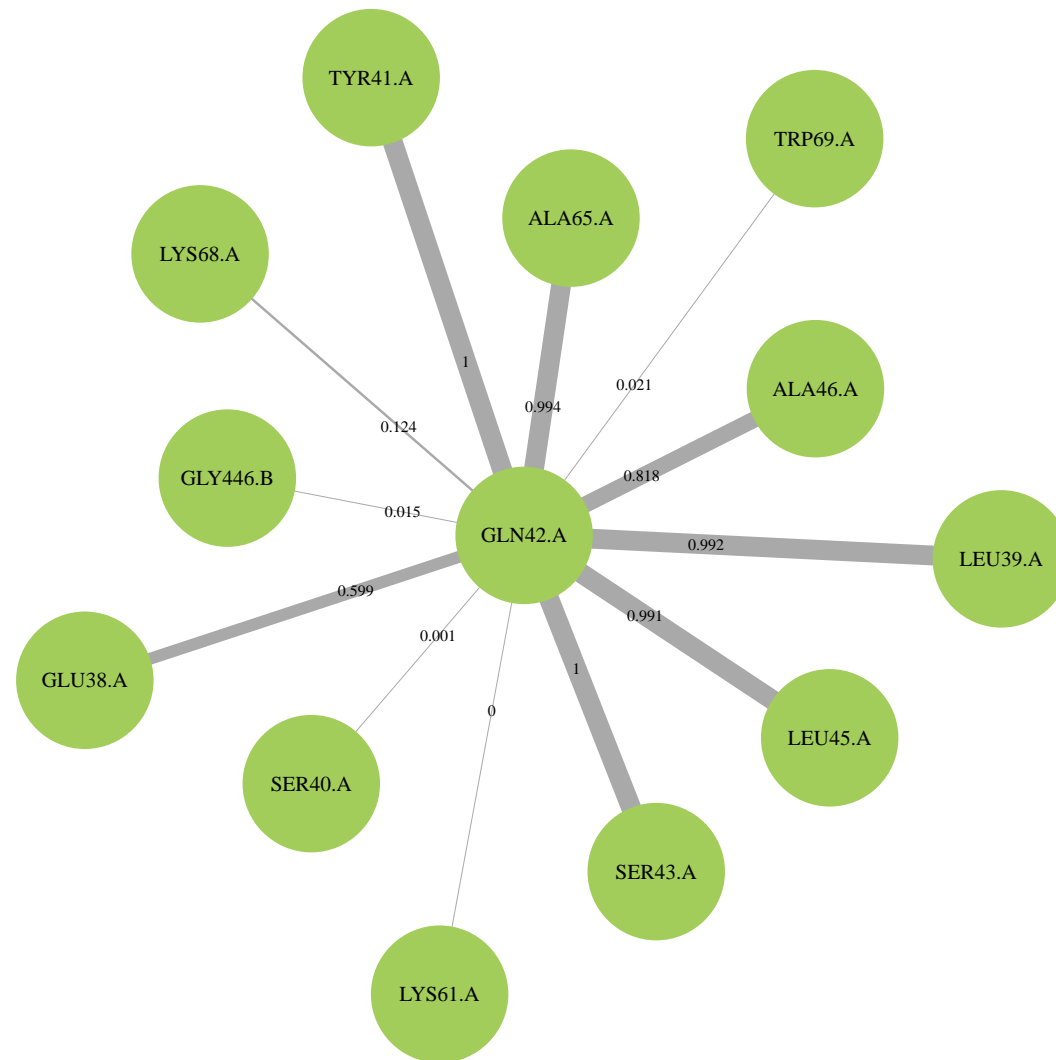



### TYR83\_chainA\_contact network

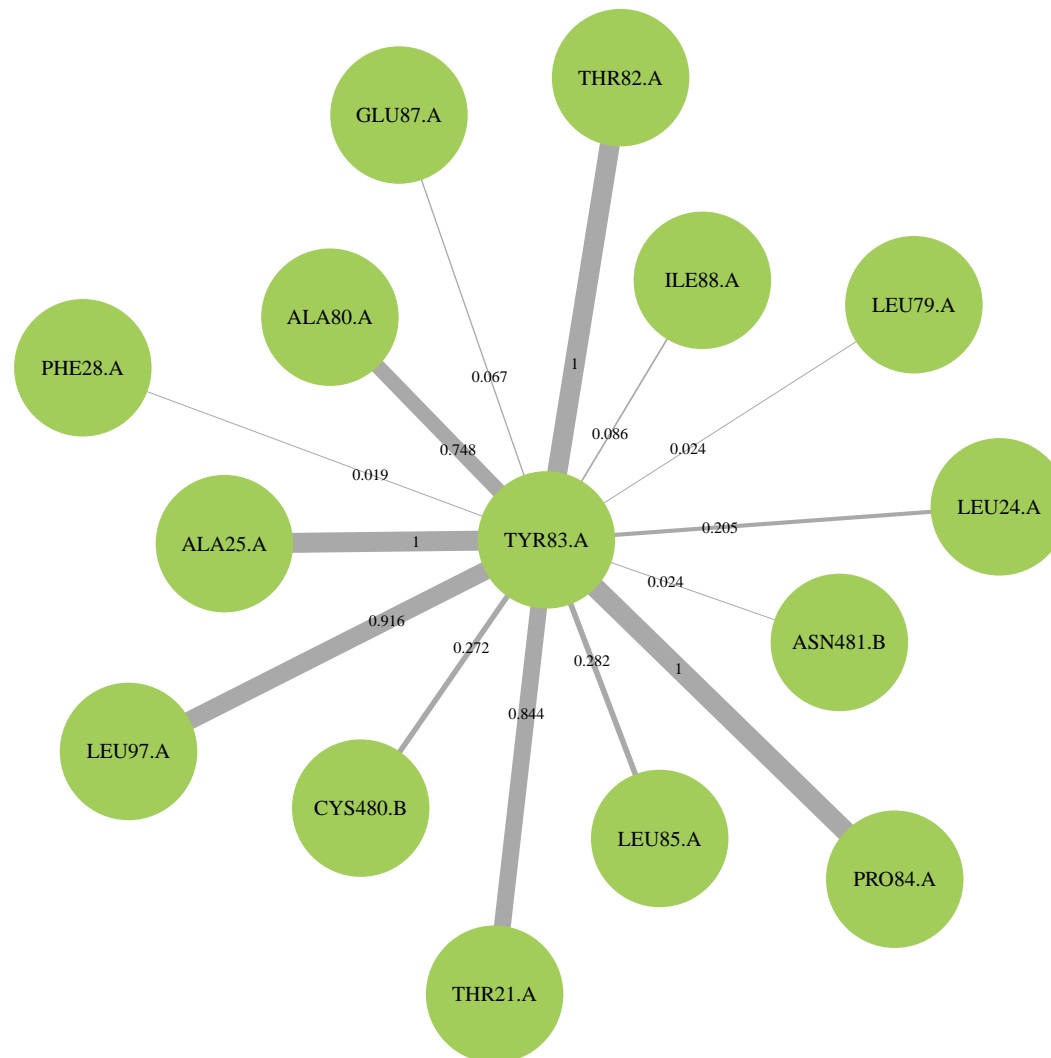

### LYS353\_chainA\_contact network

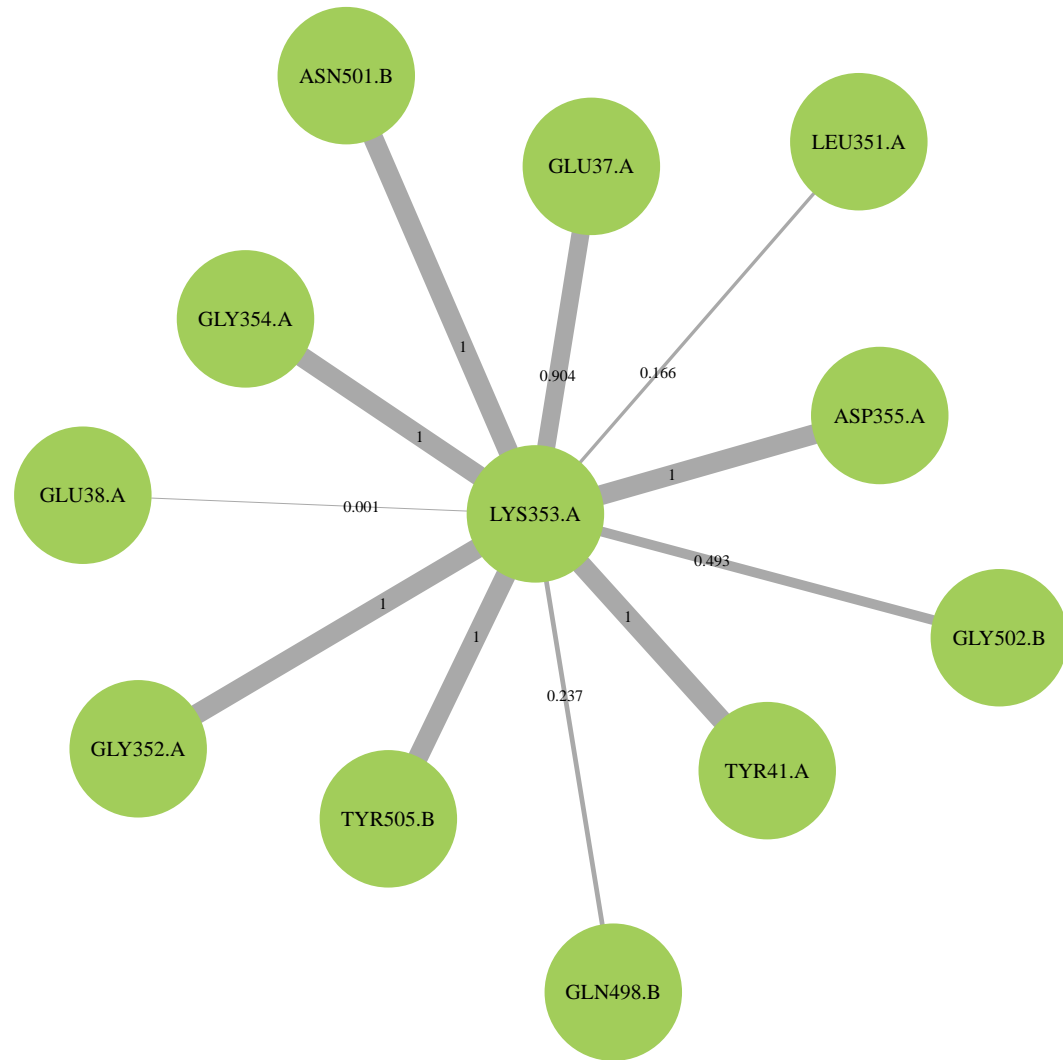

GLY354\_chainA\_contact network

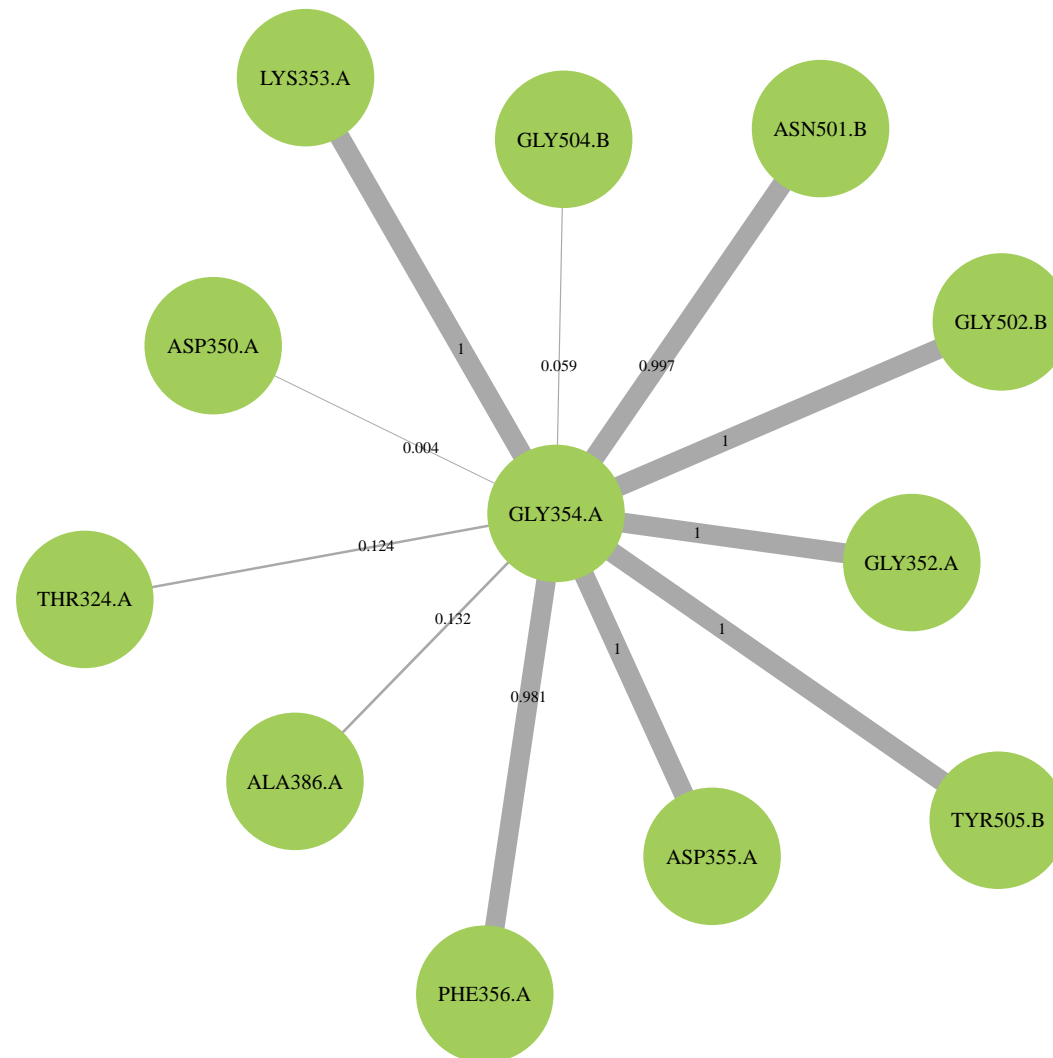

### ASP355\_chainA\_contact network

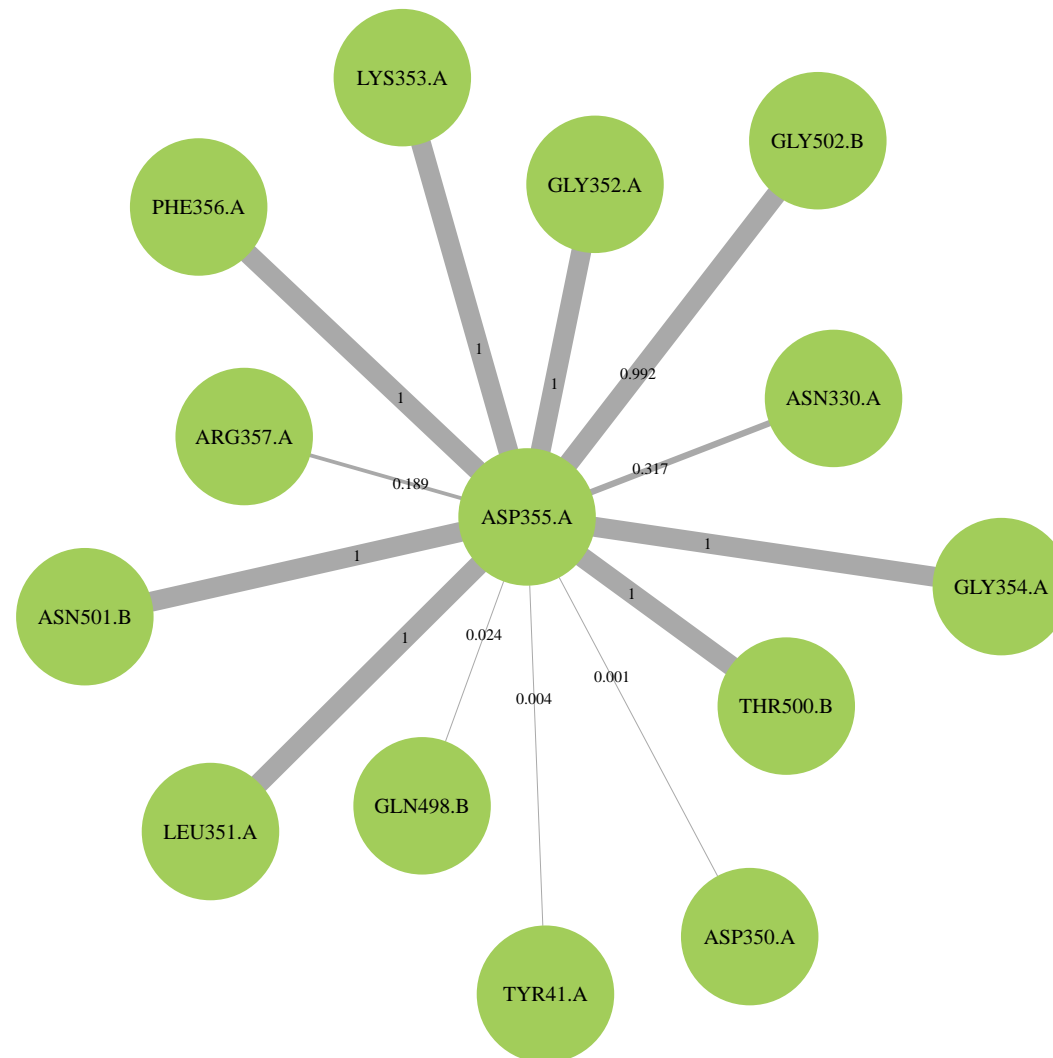

Supplement: mmc3.pdf [file mmc3.pdf]
