# Supplementary material
Source: PubMed Central journal article supplement (PMC8110333)

### GLN24\_chainA\_contact network

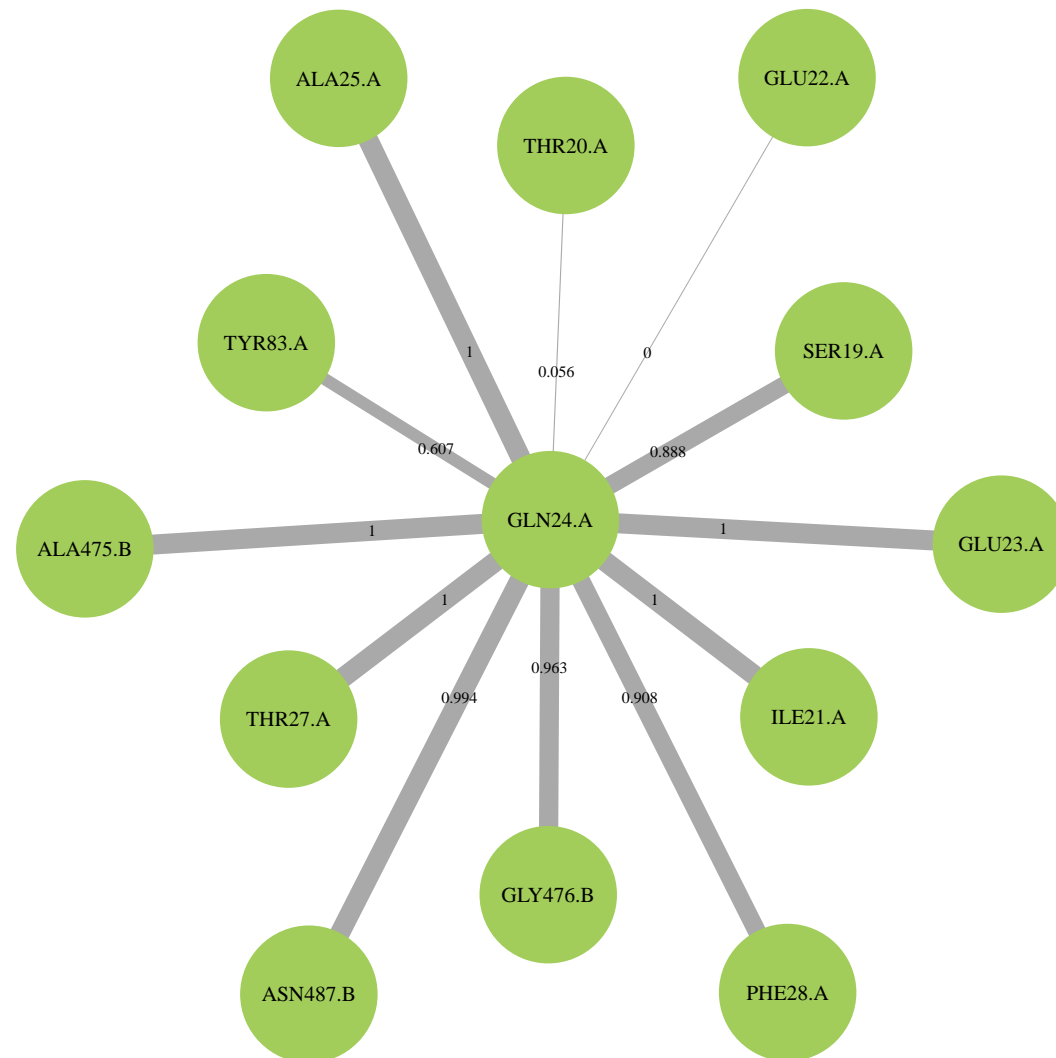

### THR27\_chainA\_contact network

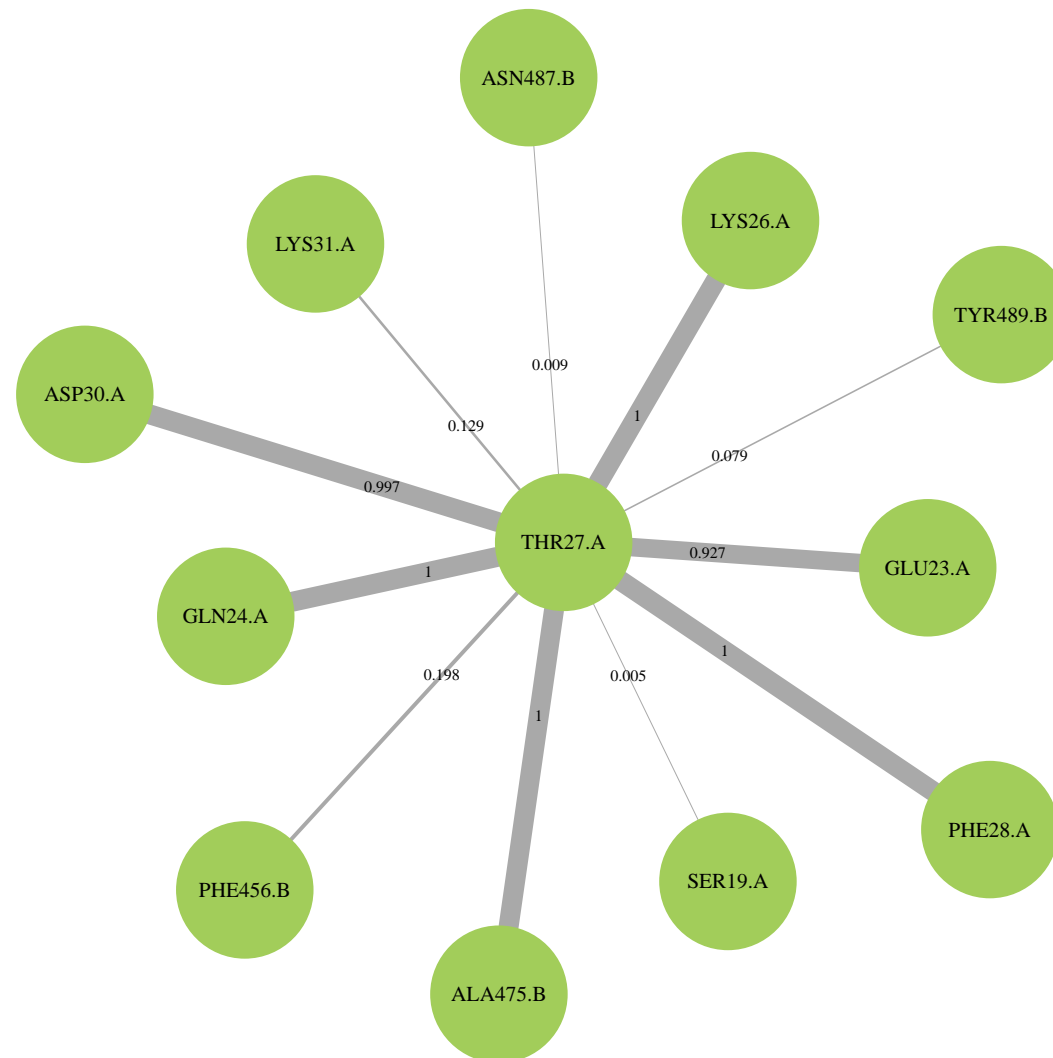

### PHE28\_chainA\_contact network

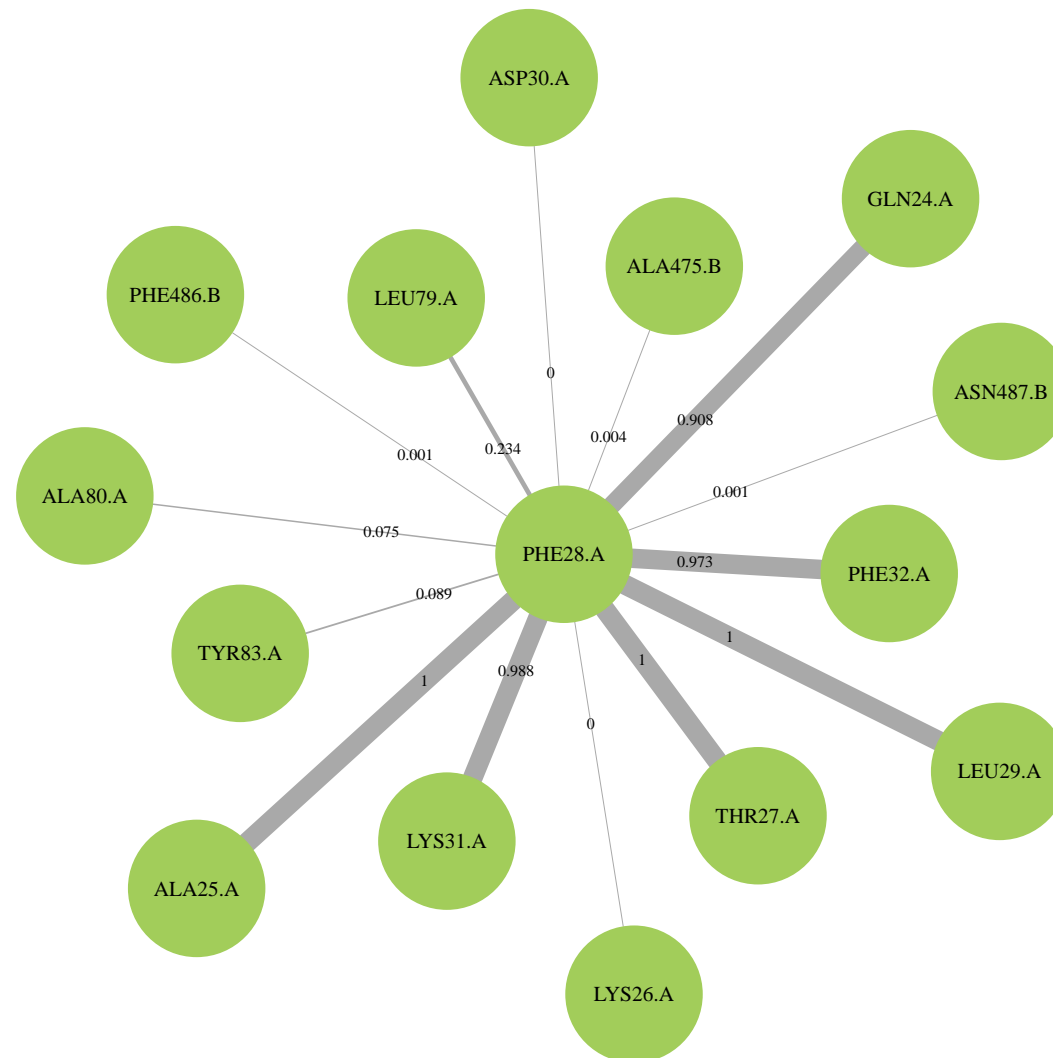

LYS31\_chainA\_contact network

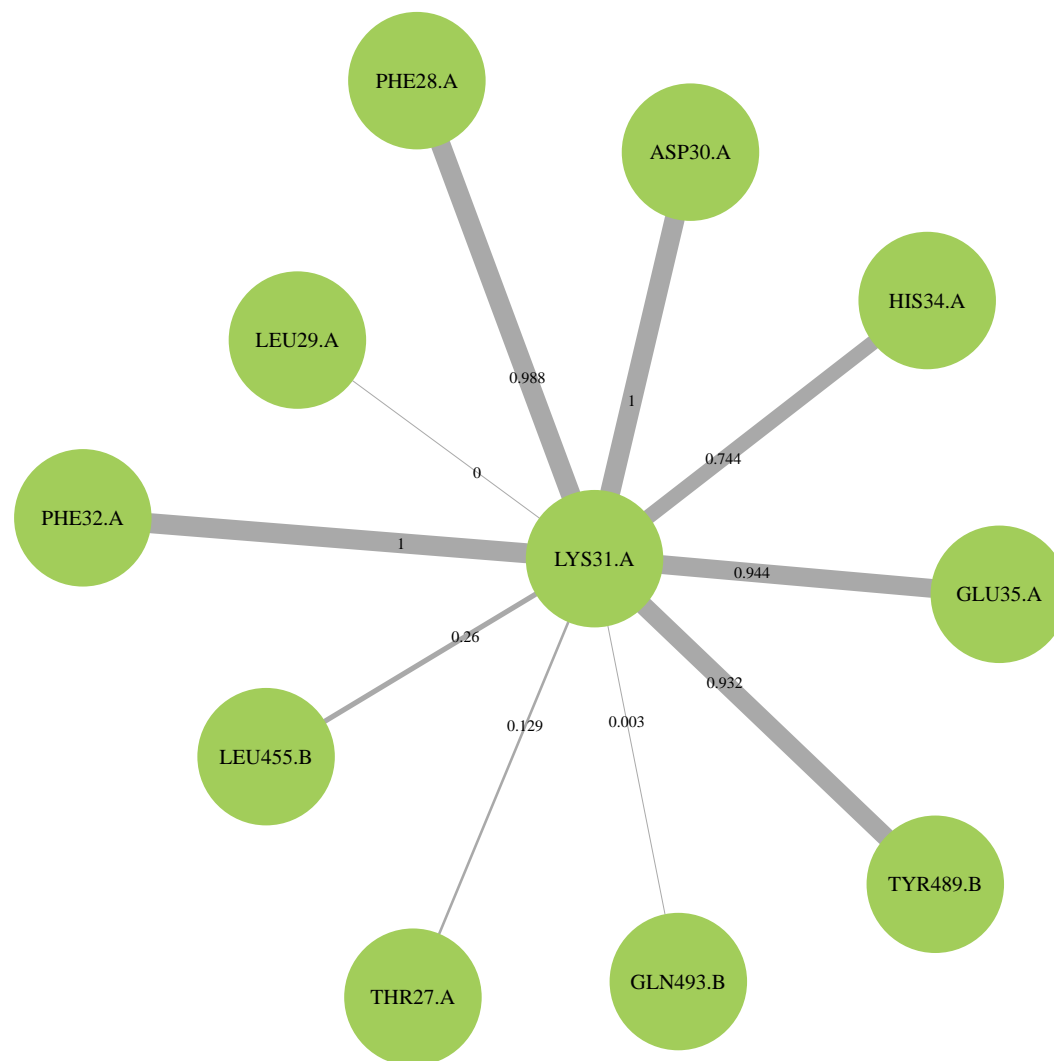

### HIS34\_chainA\_contact network

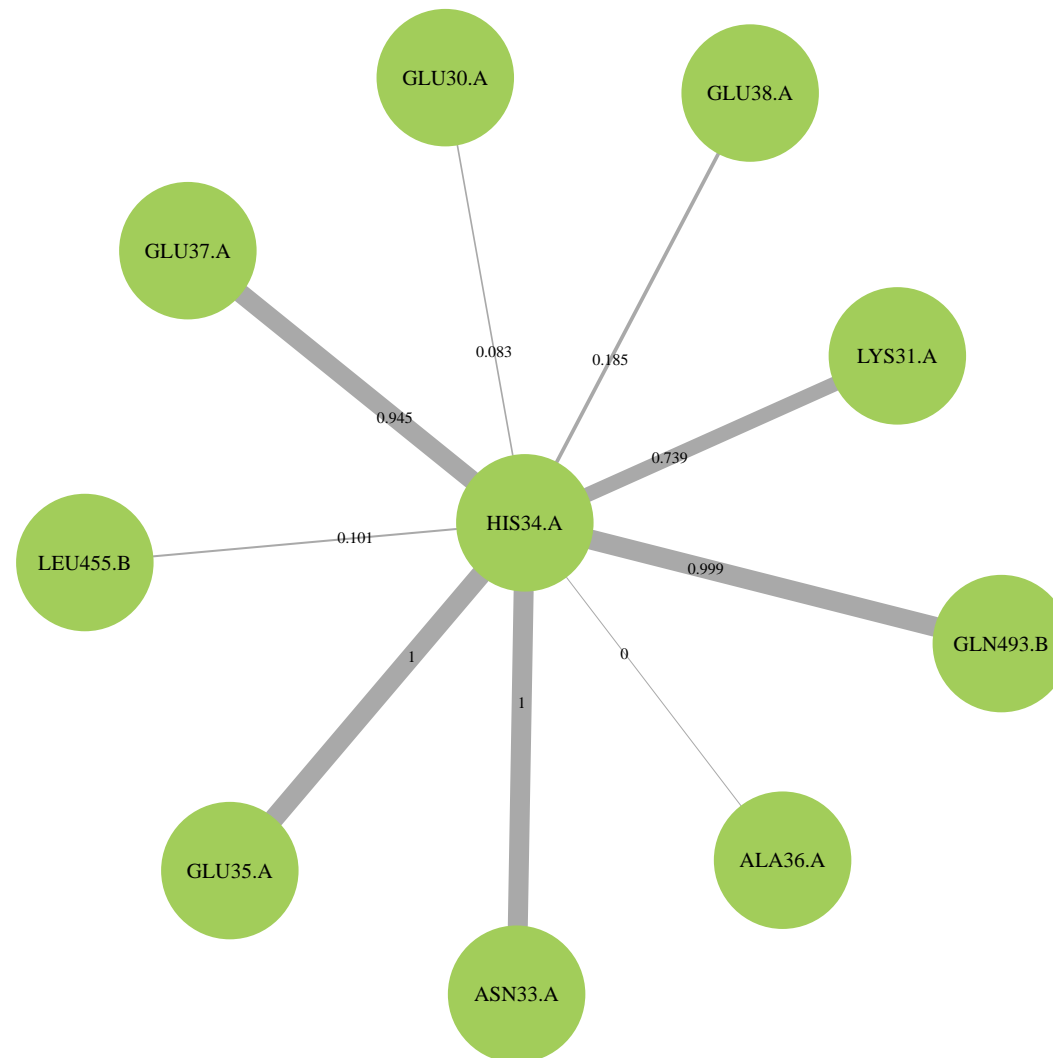

### ASP38\_chainA\_contact network

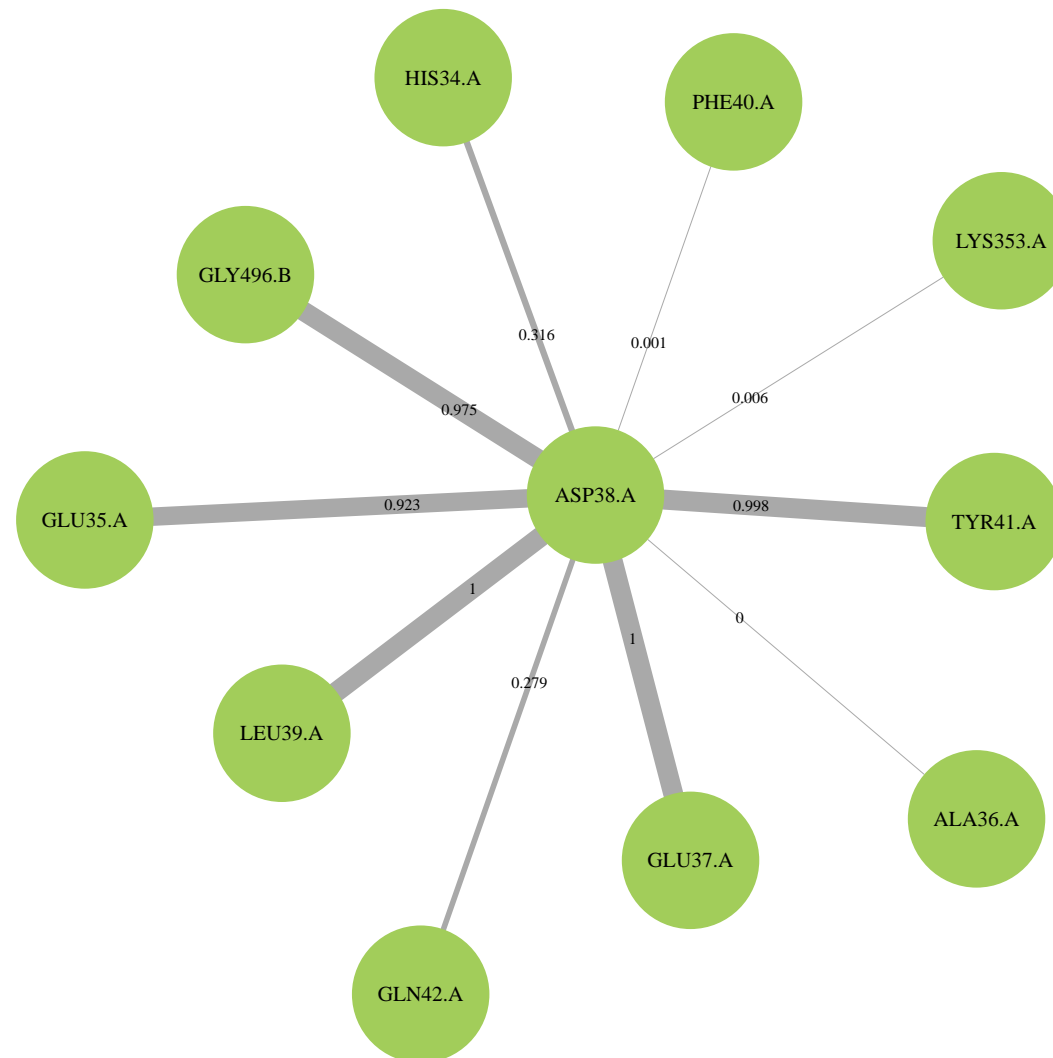

### TYR41\_chainA\_contact network

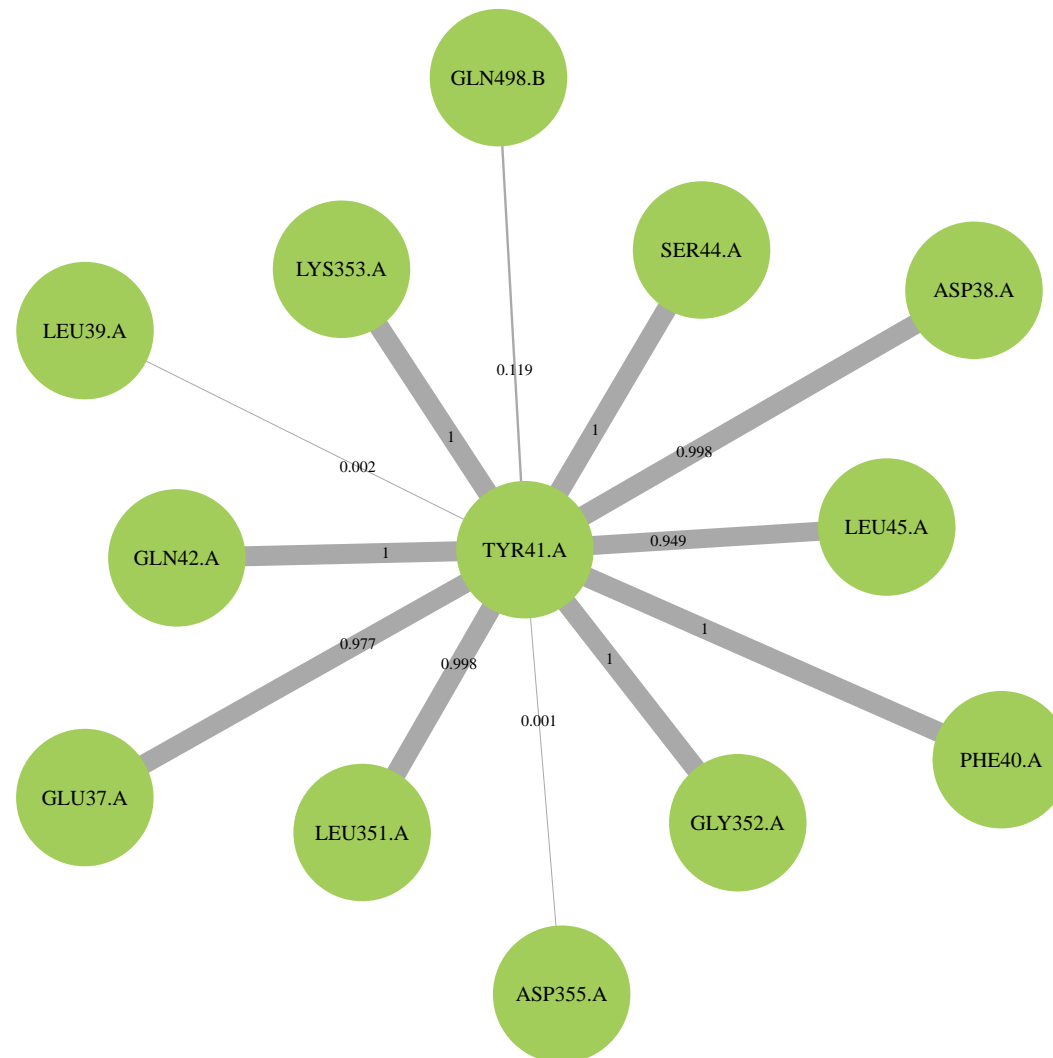

### GLN42\_chainA\_contact network

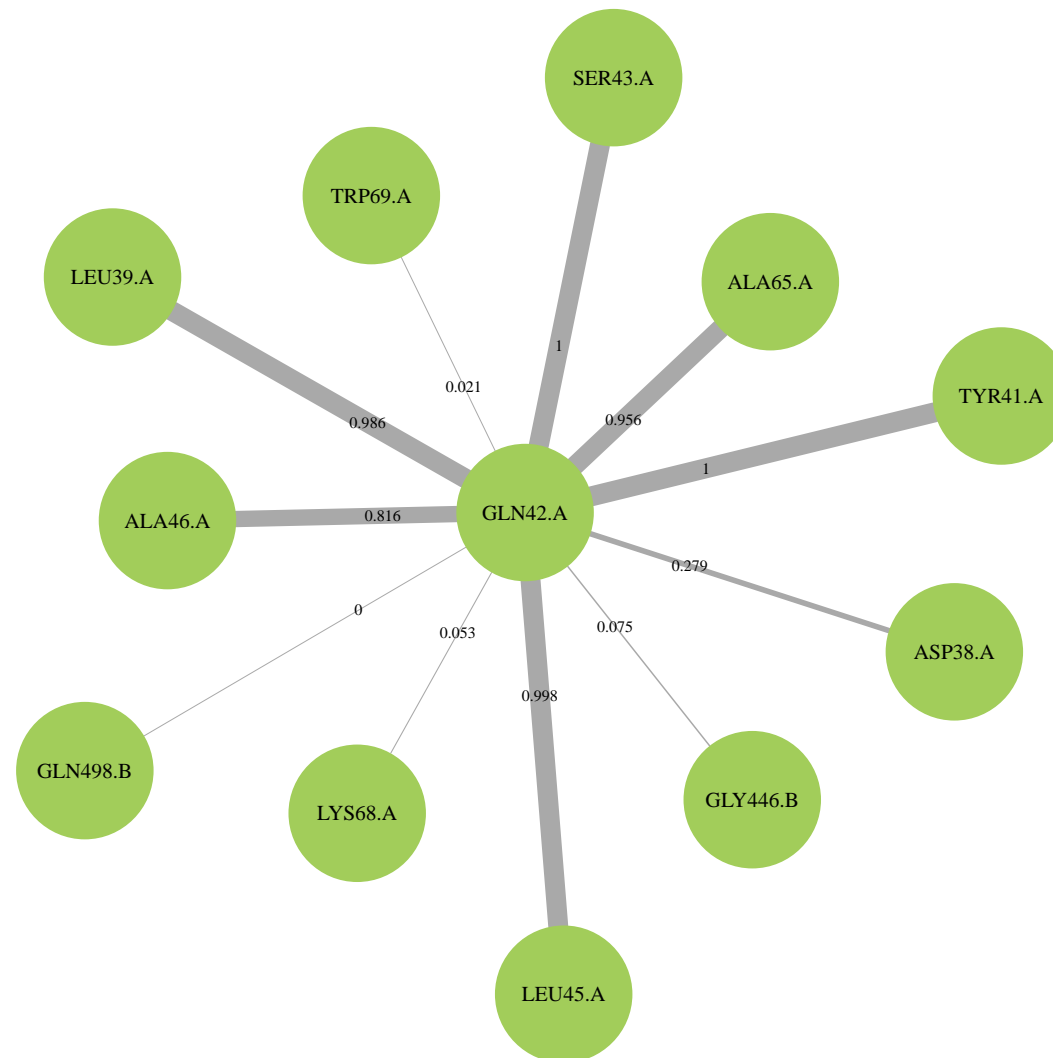



TYR83\_chainA\_contact network

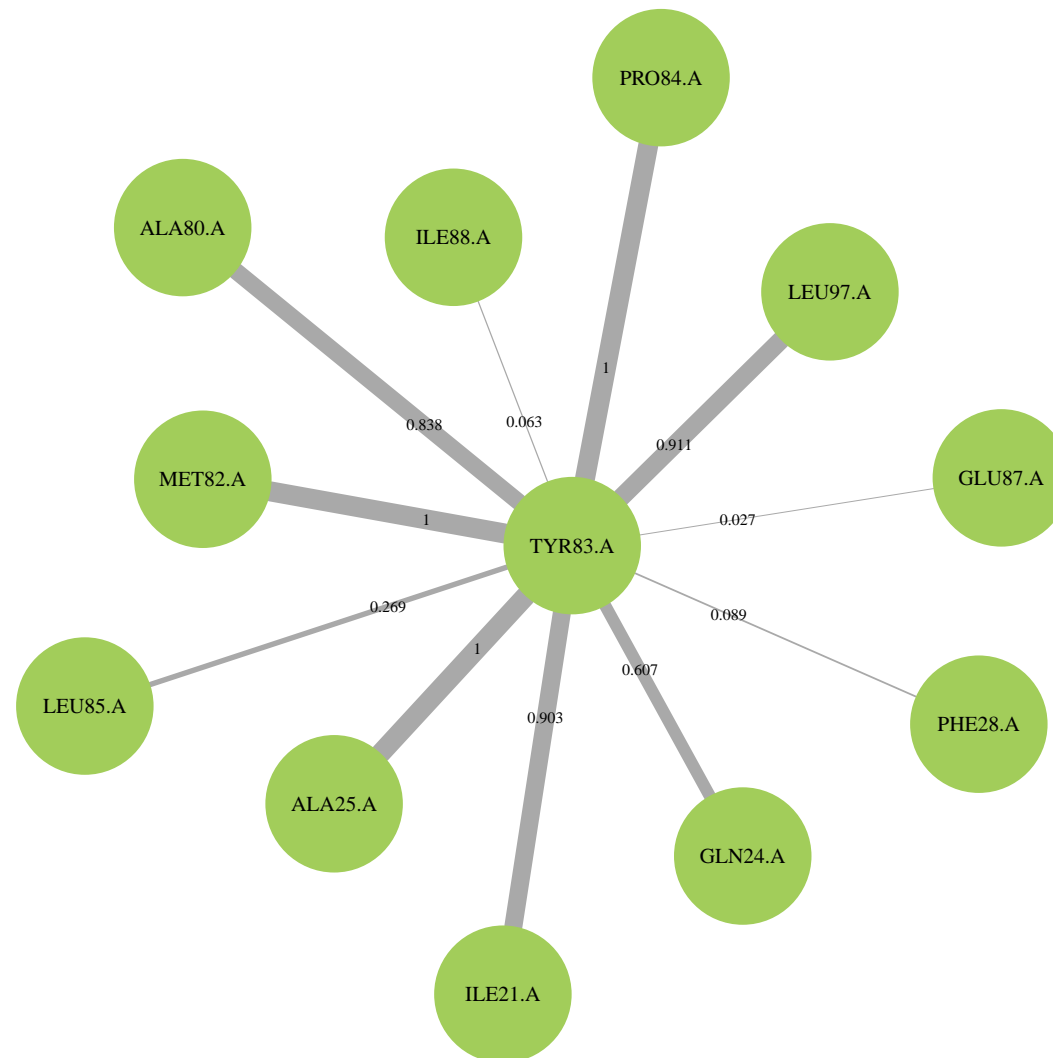

### LYS353\_chainA\_contact network

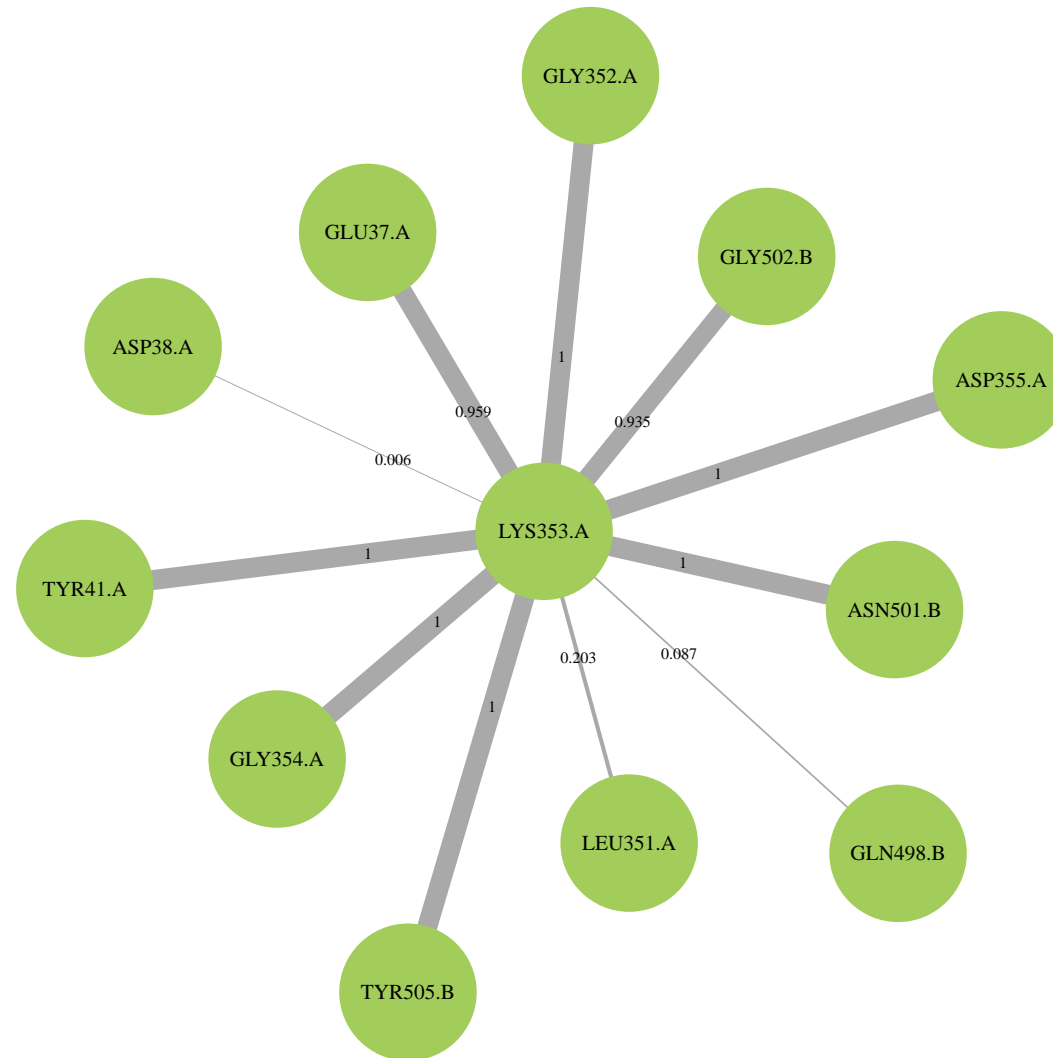

GLY354\_chainA\_contact network

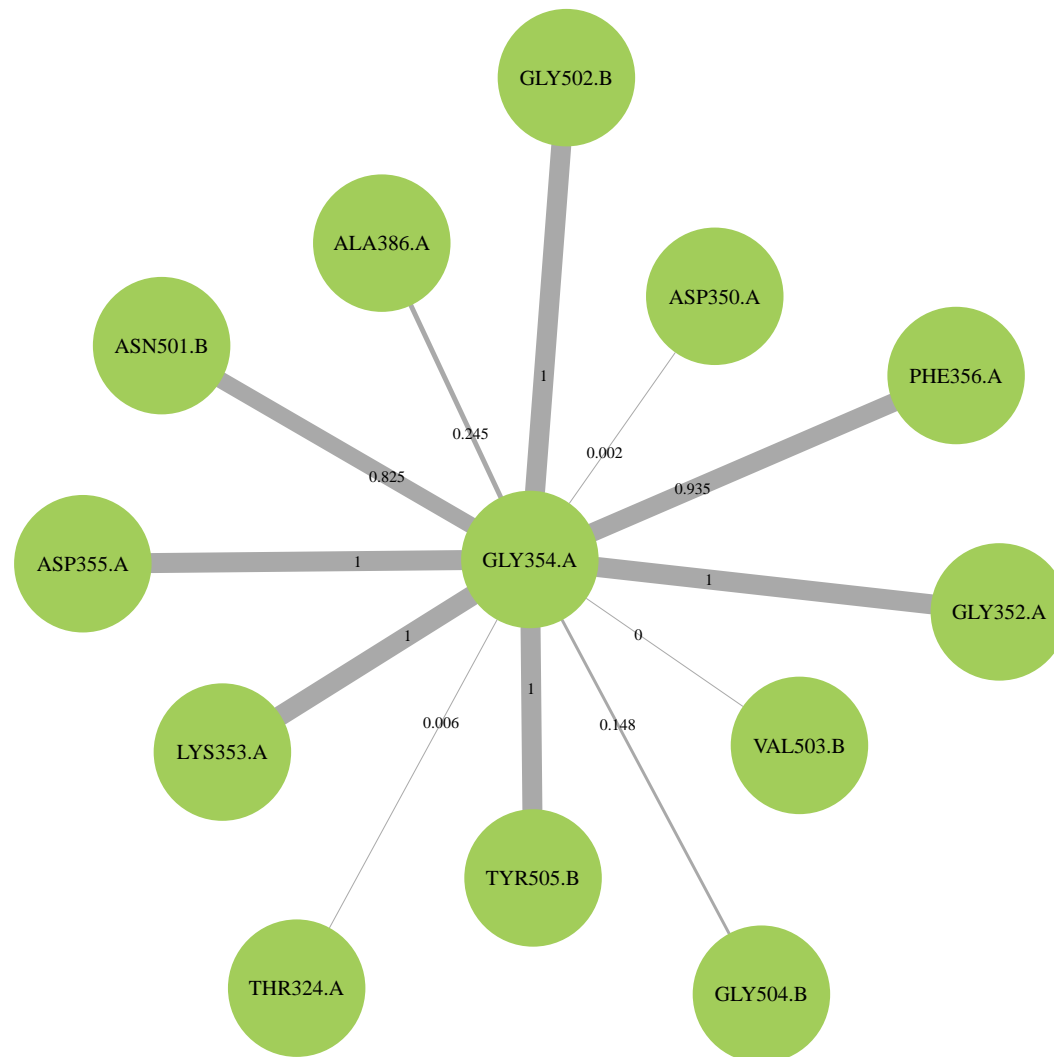

### ASP355\_chainA\_contact network

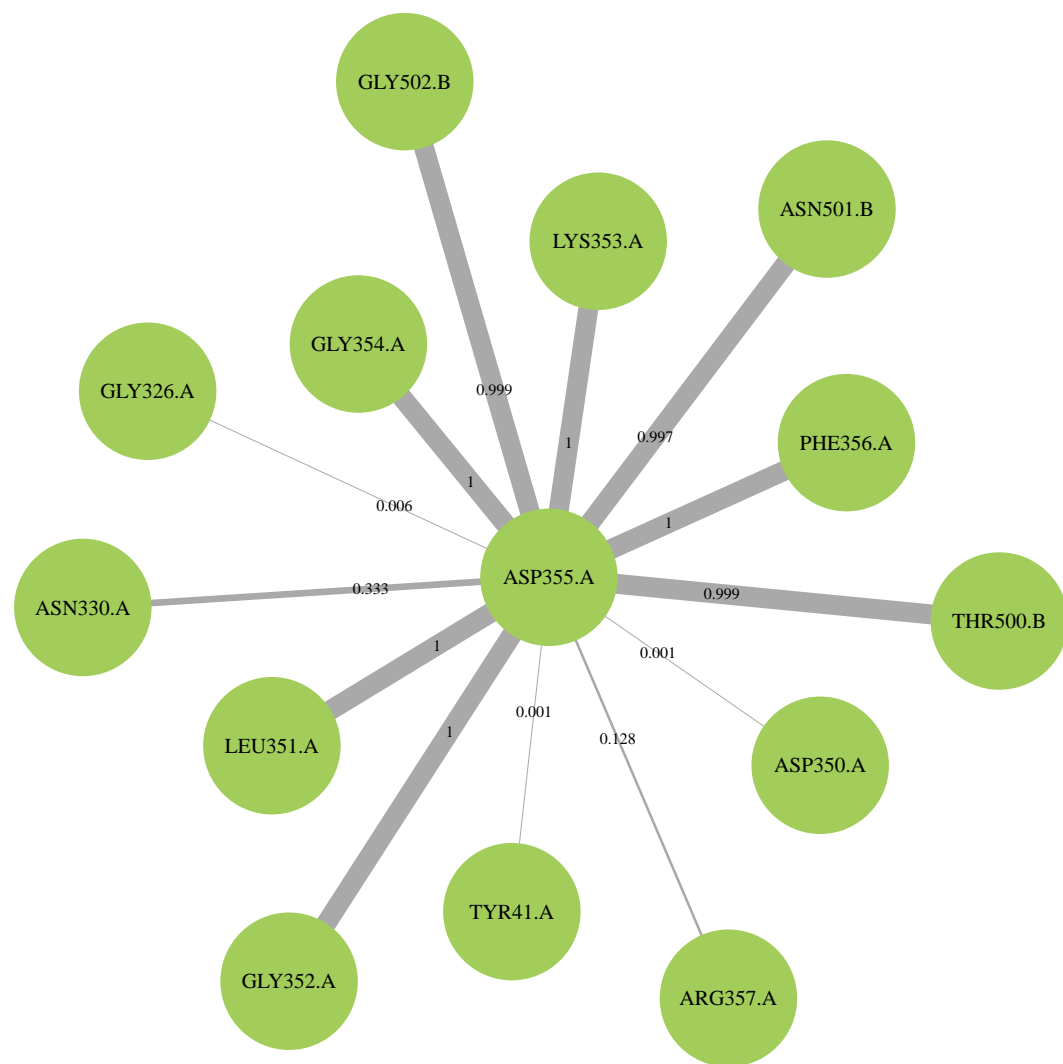

Supplement: mmc4.pdf [file mmc4.pdf]
