# Supplementary material
Source: PubMed Central journal article supplement (PMC8110333)

### GLU24\_chainA\_contact network

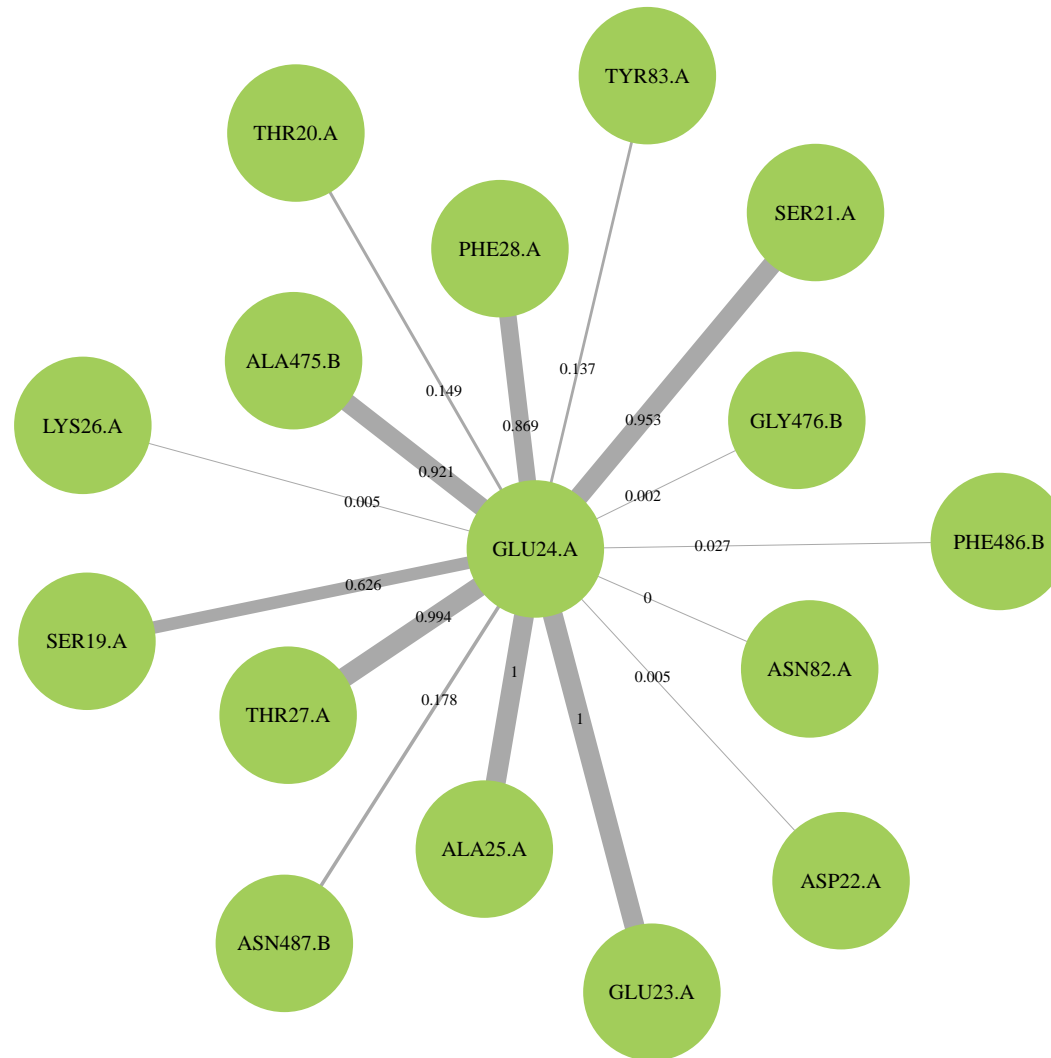

### THR27\_chainA\_contact network

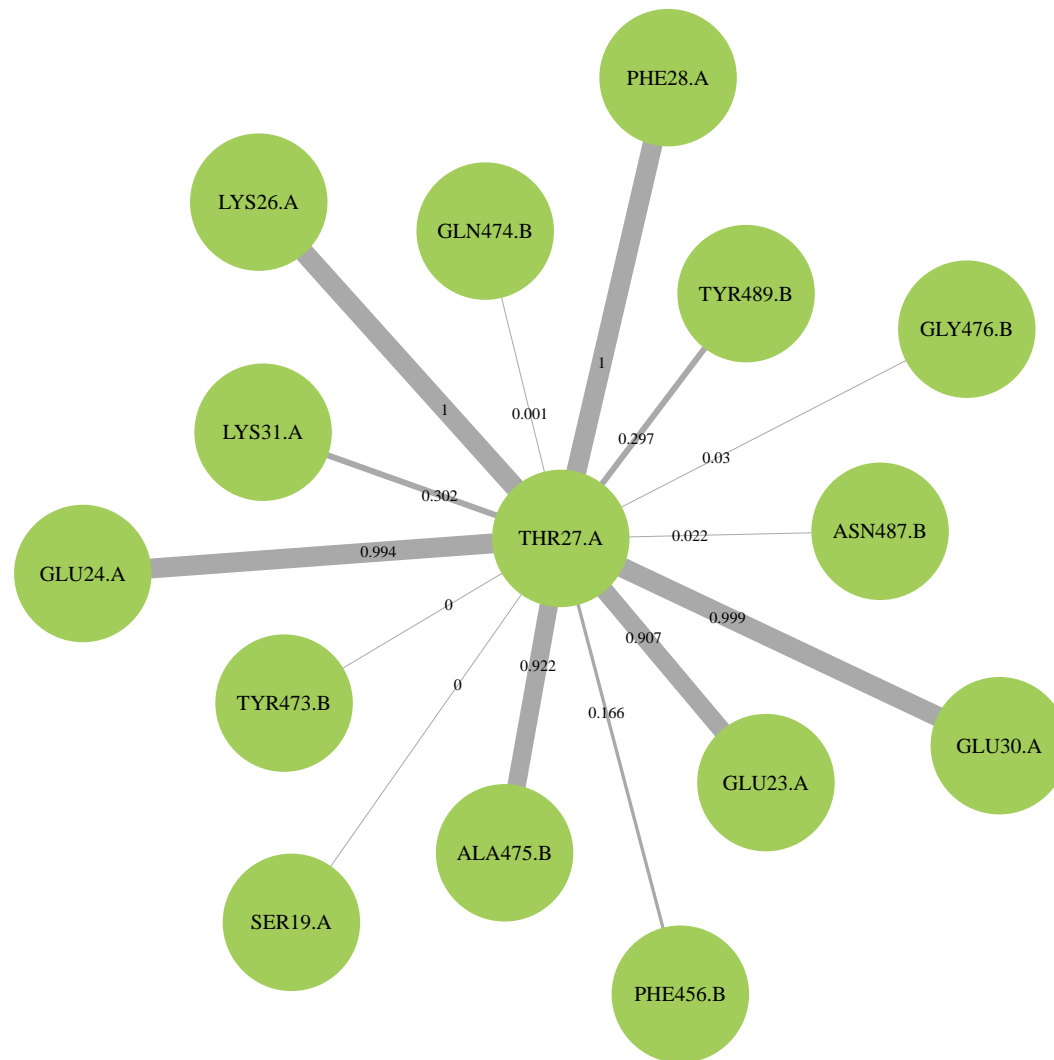

### PHE28\_chainA\_contact network

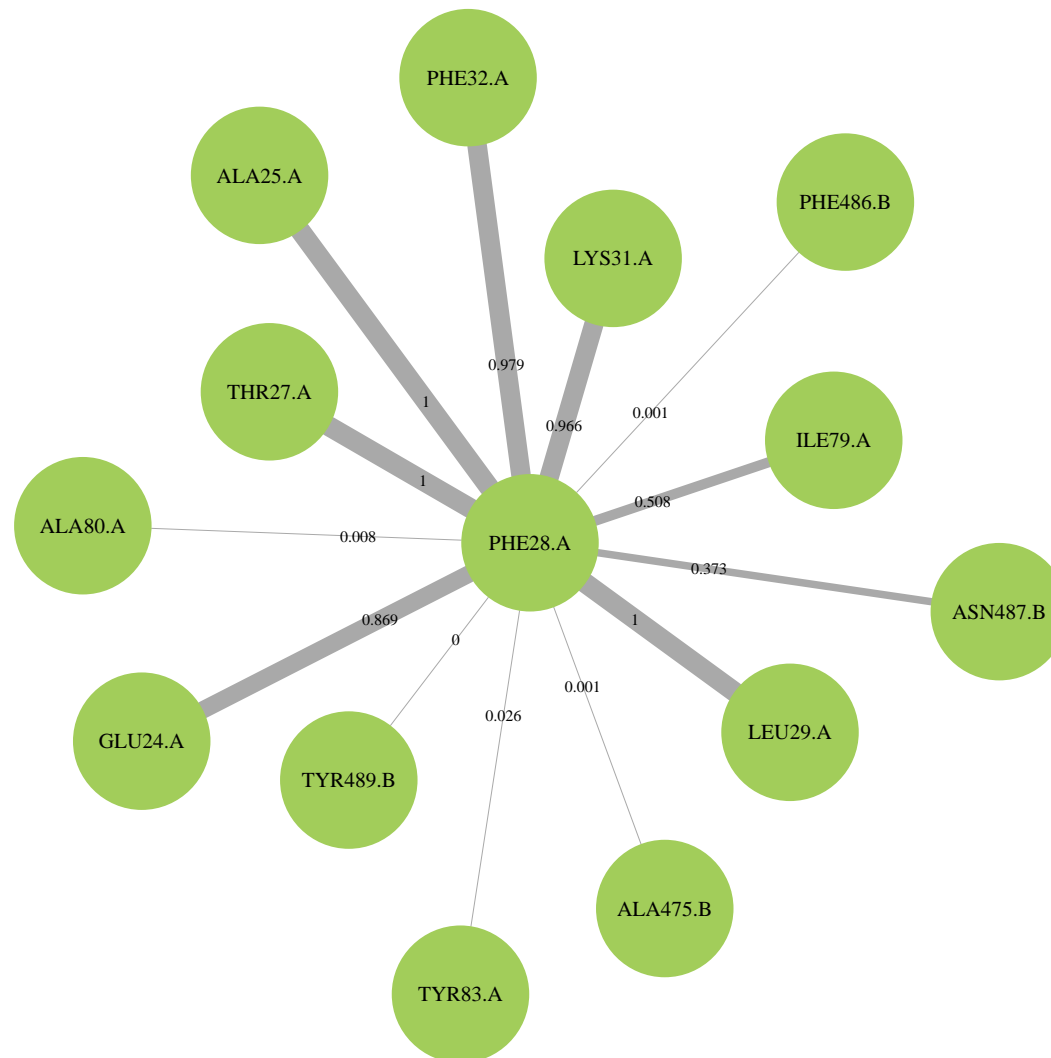

### LYS31\_chainA\_contact network

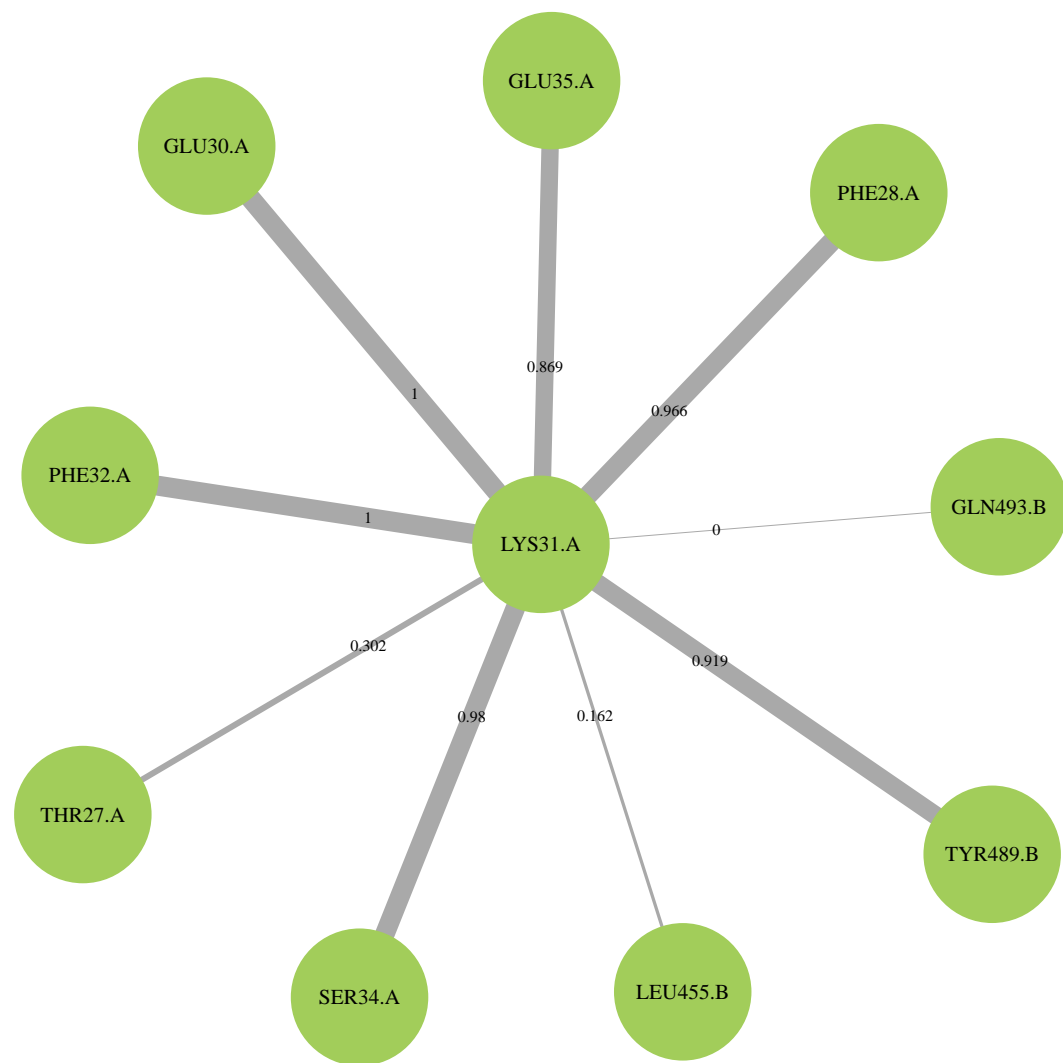

### SER34\_chainA\_contact network

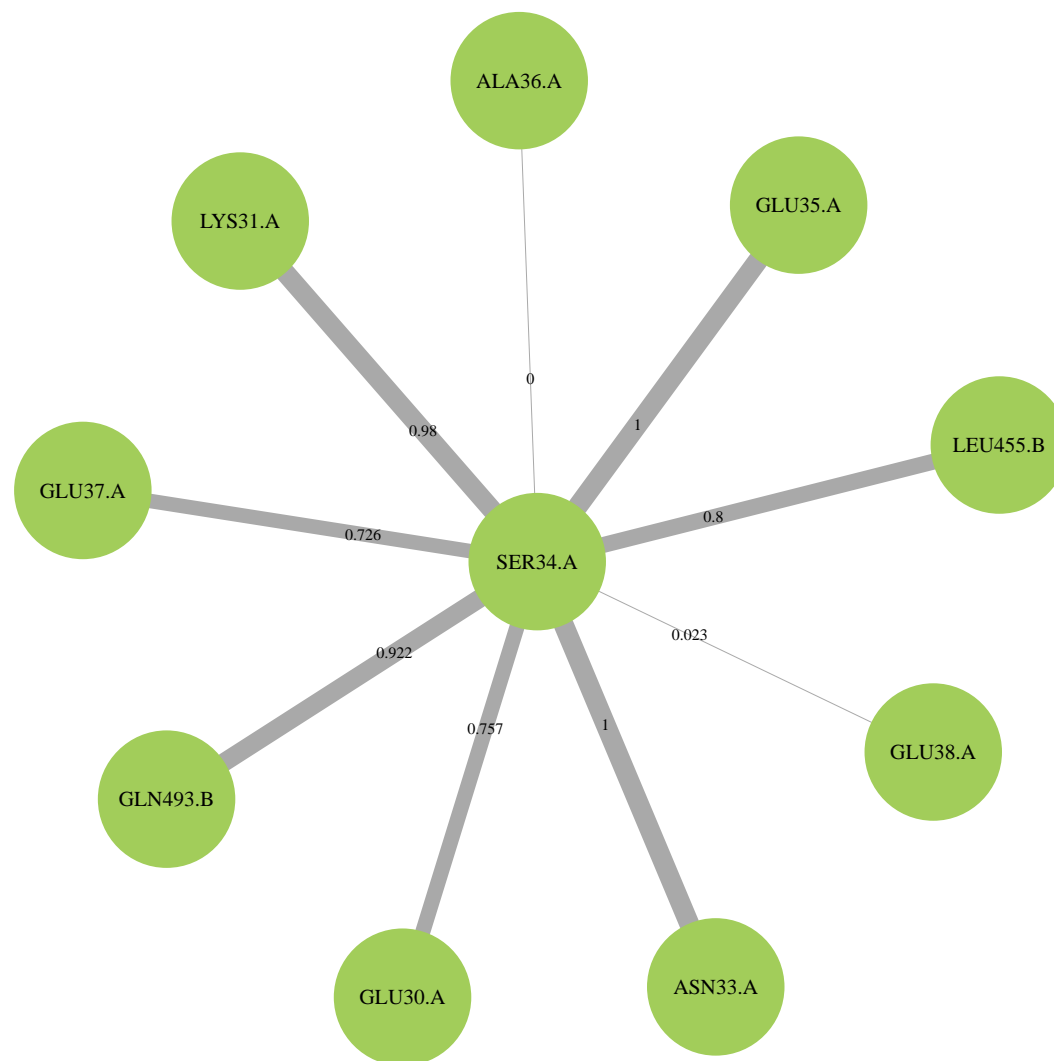

### GLU38\_chainA\_contact network

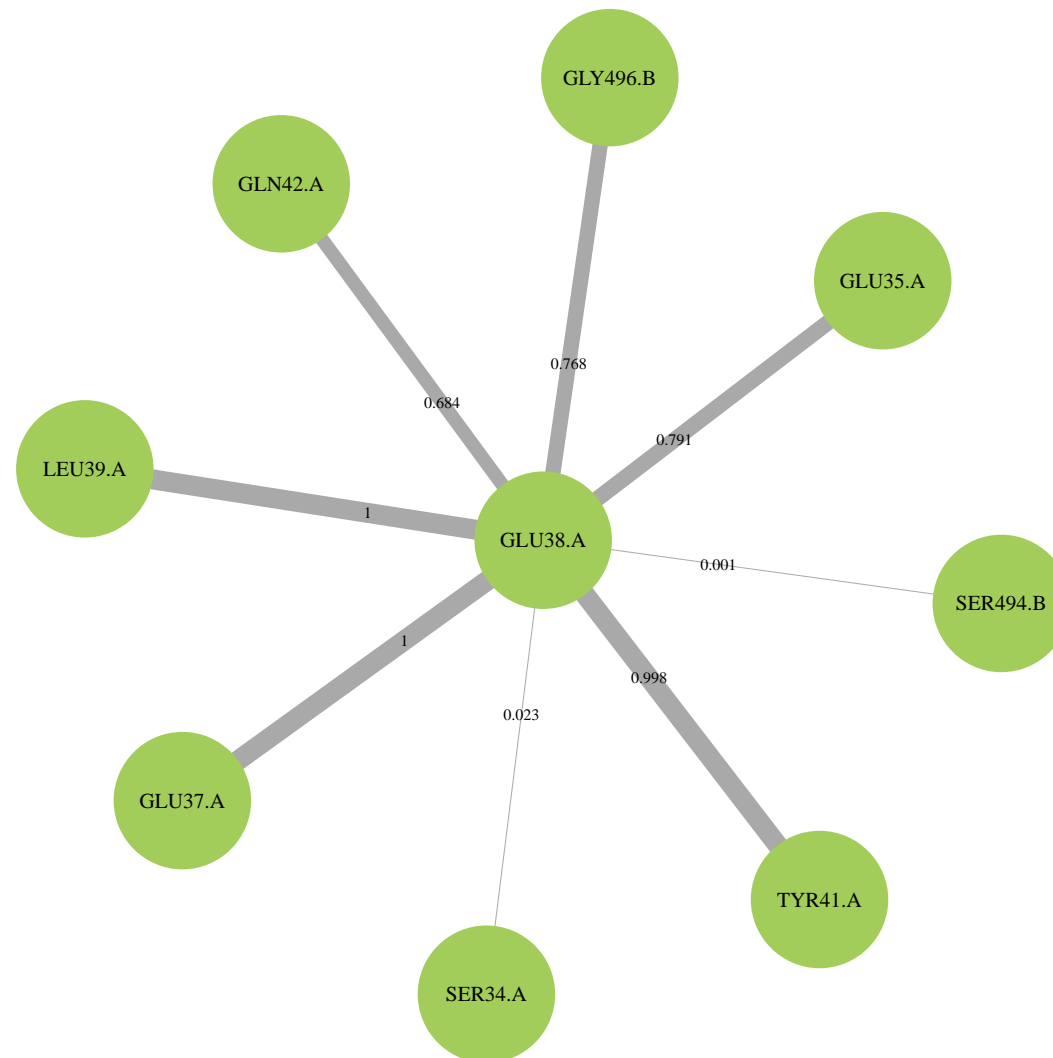

### TYR41\_chainA\_contact network

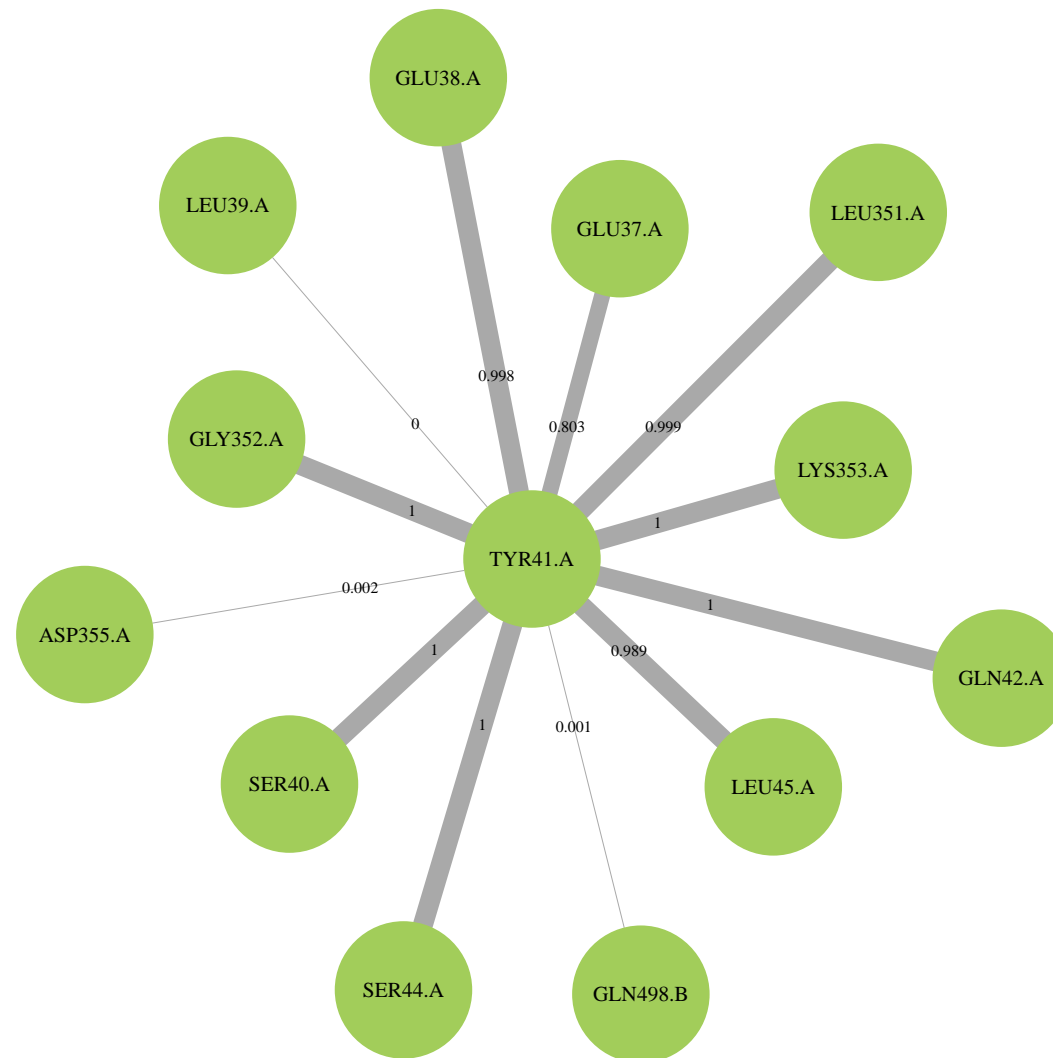

GLN42\_chainA\_contact network

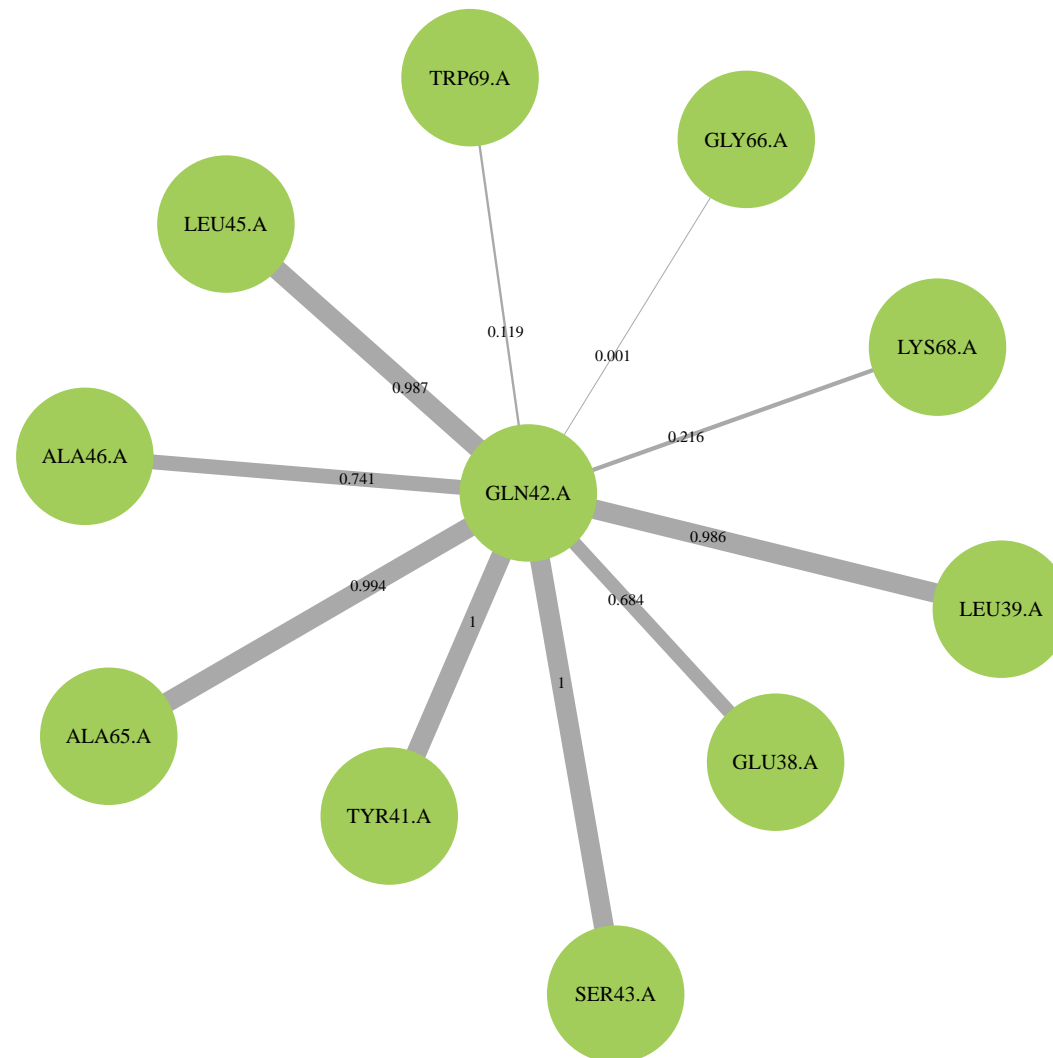



### TYR83\_chainA\_contact network

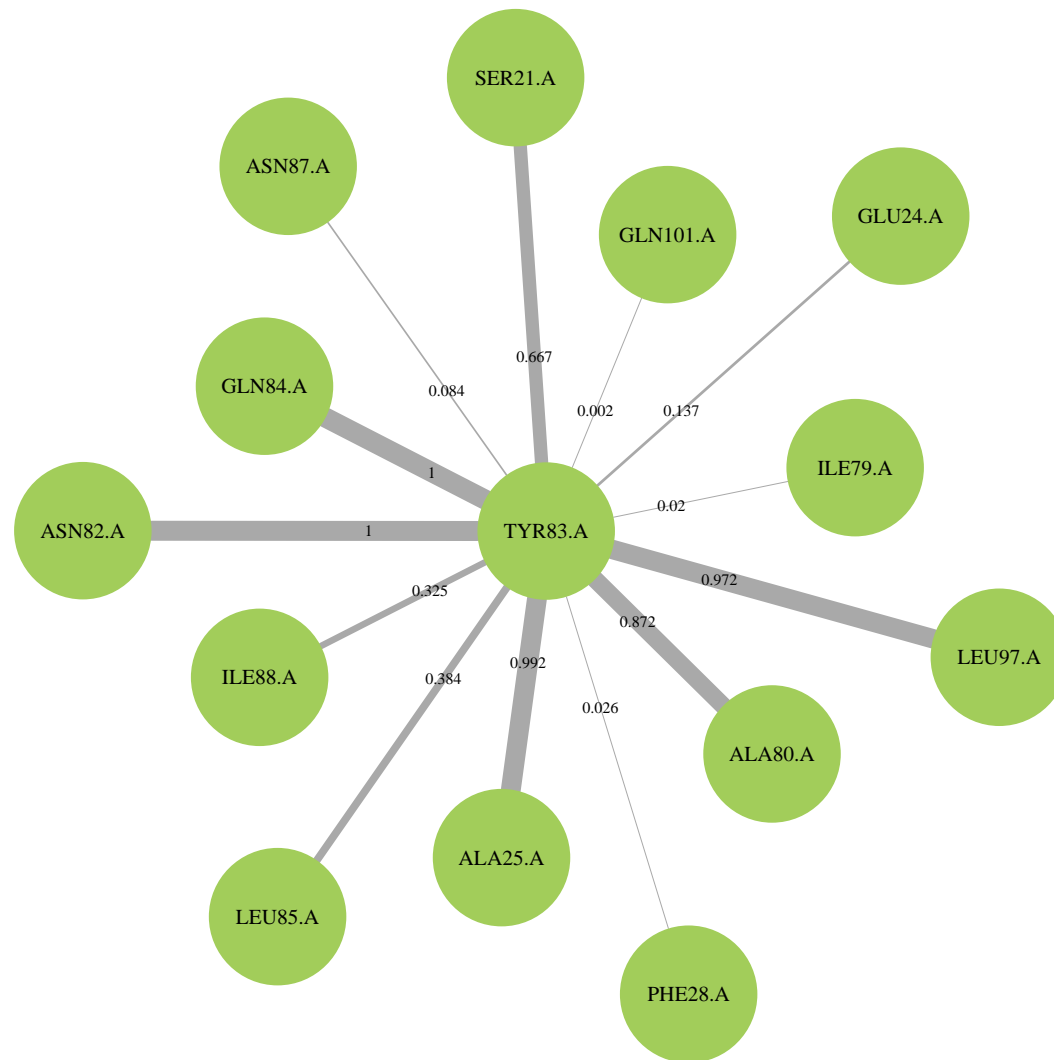

### LYS353\_chainA\_contact network

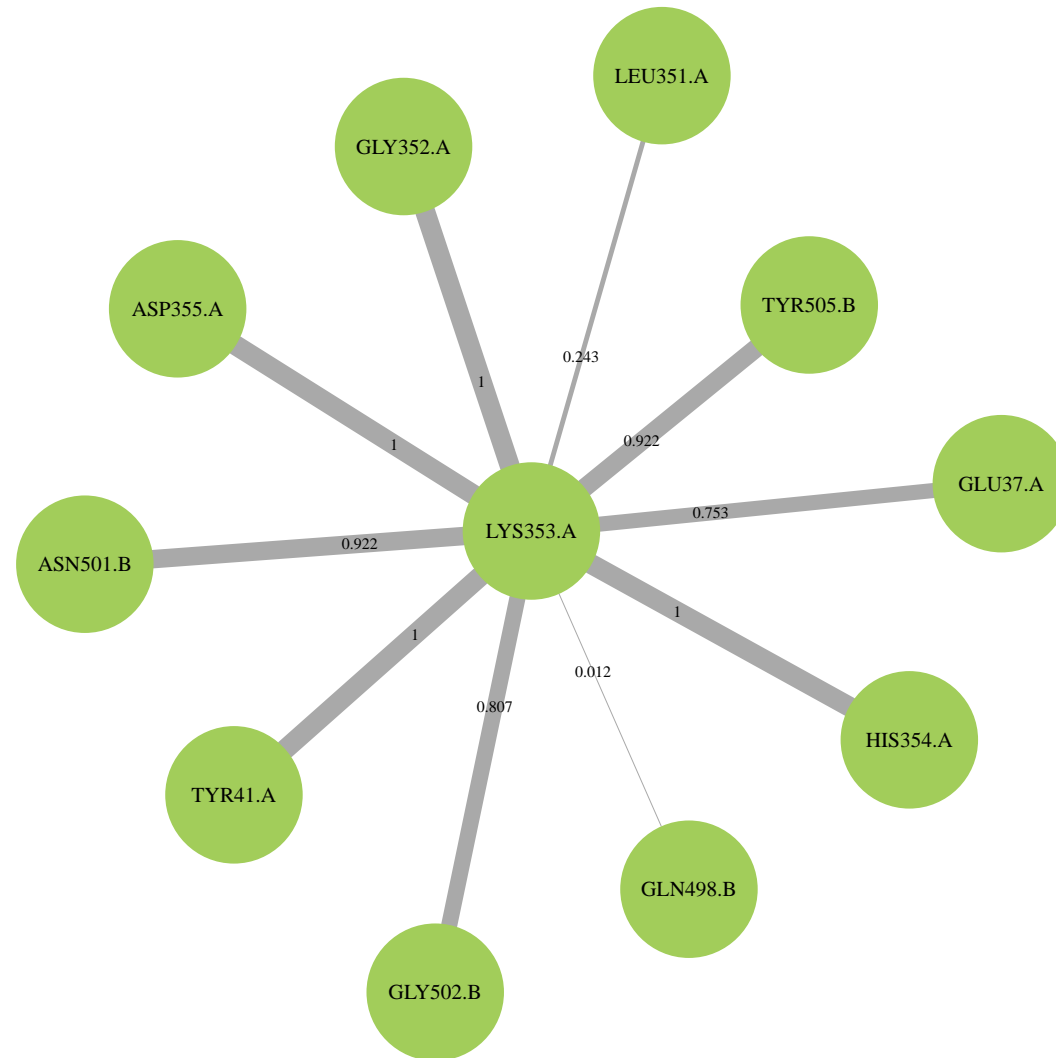

### HIS354\_chainA\_contact network

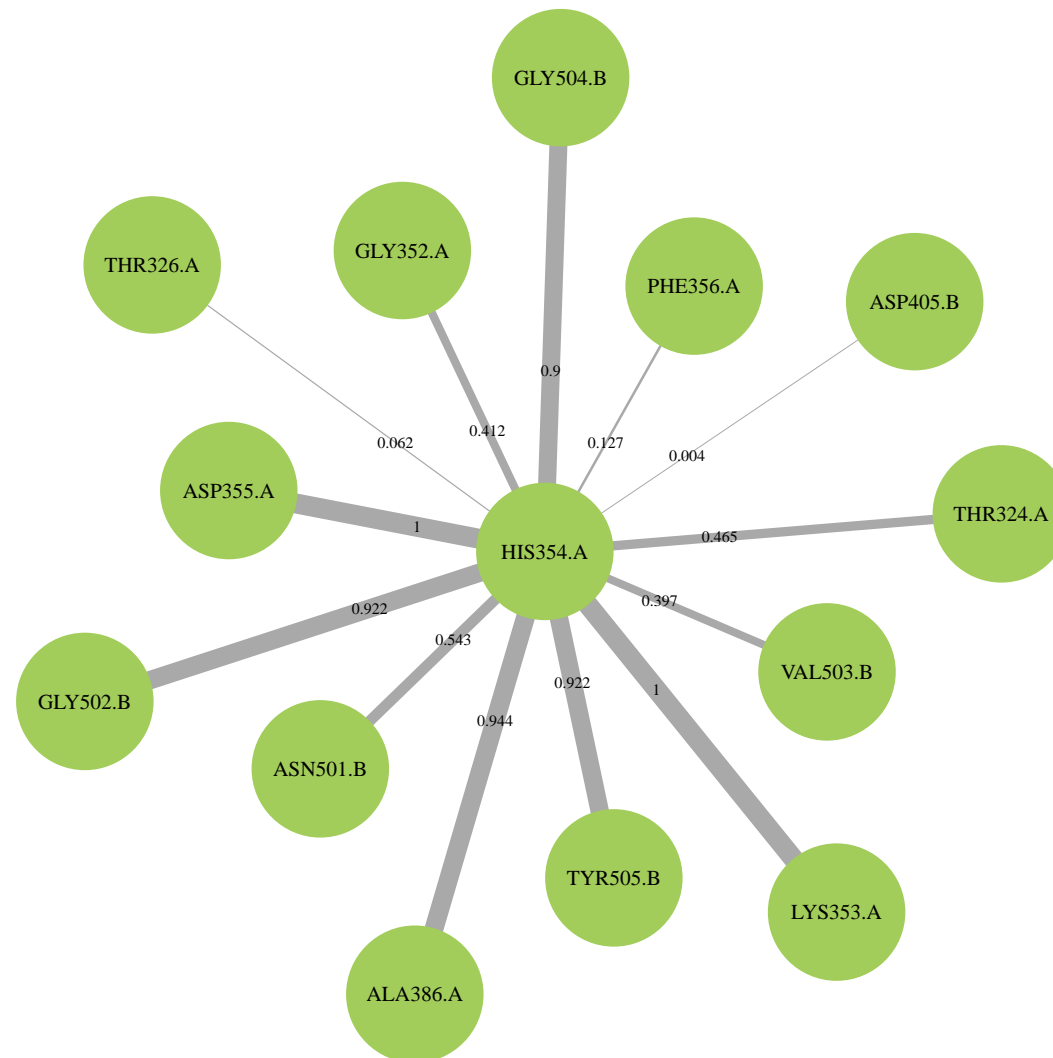

### ASP355\_chainA\_contact network

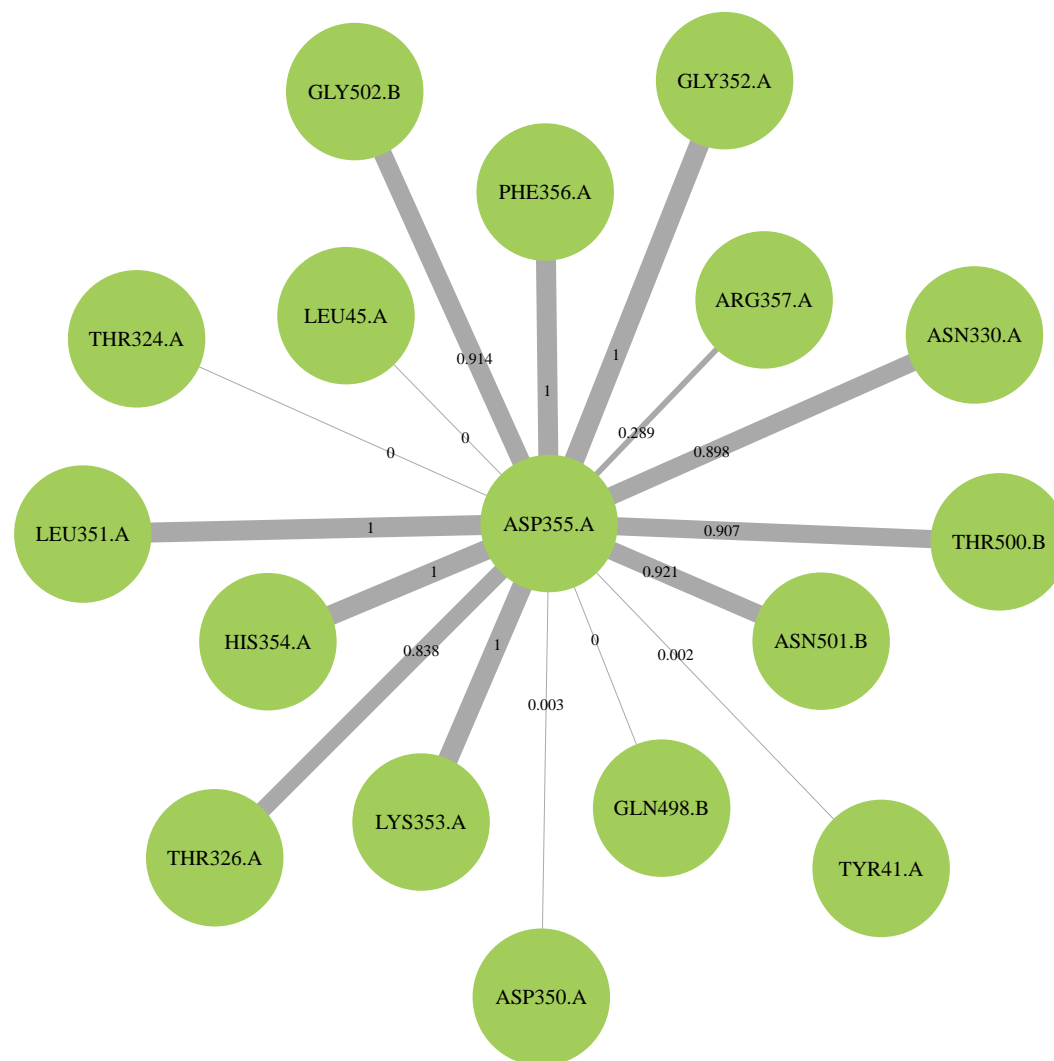

Supplement: mmc6.pdf [file mmc6.pdf]
